# Supplementary material for: Gender and other potential biases in peer review: cross-sectional analysis of 38 250 external peer review reports
Source: PubMed Central journal article supplement (PMC7440717; doi:10.1136/bmjopen-2019-035058), 2020-08-20
Supplement: bmjopen-2019-035058.draft_revisions.pdf [file bmjopen-2019-035058.draft_revisions.pdf]

# BMJ Open

BMJ Open is committed to open peer review. As part of this commitment we make the peer review history of every article we publish publicly available.

When an article is published we post the peer reviewers' comments and the authors' responses online. We also post the versions of the paper that were used during peer review. These are the versions that the peer review comments apply to.

The versions of the paper that follow are the versions that were submitted during the peer review process. They are not the versions of record or the final published versions. They should not be cited or distributed as the published version of this manuscript.

BMJ Open is an open access journal and the full, final, typeset and author-corrected version of record of the manuscript is available on our site with no access controls, subscription charges or pay-per-view fees (<http://bmjopen.bmj.com>).

If you have any questions on BMJ Open's open peer review process please email [info.bmjopen@bmj.com](mailto:info.bmjopen@bmj.com)

# BMJ Open

## Gender and Other Potential Biases in Peer Review: Cross-sectional Analysis of 38,250 External Peer Review Reports

|                               |                                                                                                                                                                                                                                                                                                                                       |
|-------------------------------|---------------------------------------------------------------------------------------------------------------------------------------------------------------------------------------------------------------------------------------------------------------------------------------------------------------------------------------|
| Journal:                      | <i>BMJ Open</i>                                                                                                                                                                                                                                                                                                                       |
| Manuscript ID                 | bmjopen-2019-035058                                                                                                                                                                                                                                                                                                                   |
| Article Type:                 | Original research                                                                                                                                                                                                                                                                                                                     |
| Date Submitted by the Author: | 18-Oct-2019                                                                                                                                                                                                                                                                                                                           |
| Complete List of Authors:     | Severin, Anna; University of Bern, ISPM<br>Martins, Joao; European Research Council<br>Heyard, Rachel; Swiss National Science Foundation<br>Delavy, François; Swiss National Science Foundation<br>Jorstad, Anne; Swiss National Science Foundation<br>Egger, Matthias; University of Bern, Institute of Social & Preventive Medicine |
| Keywords:                     | EPIDEMIOLOGY, STATISTICS & RESEARCH METHODS, Organisational development < HEALTH SERVICES ADMINISTRATION & MANAGEMENT                                                                                                                                                                                                                 |
|                               |                                                                                                                                                                                                                                                                                                                                       |

SCHOLARONE™  
Manuscripts

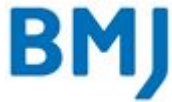

I, the Submitting Author has the right to grant and does grant on behalf of all authors of the Work (as defined in the below author licence), an exclusive licence and/or a non-exclusive licence for contributions from authors who are: i) UK Crown employees; ii) where BMJ has agreed a CC-BY licence shall apply, and/or iii) in accordance with the terms applicable for US Federal Government officers or employees acting as part of their official duties; on a worldwide, perpetual, irrevocable, royalty-free basis to BMJ Publishing Group Ltd ("BMJ") its licensees and where the relevant Journal is co-owned by BMJ to the co-owners of the Journal, to publish the Work in this journal and any other BMJ products and to exploit all rights, as set out in our [licence](#).

The Submitting Author accepts and understands that any supply made under these terms is made by BMJ to the Submitting Author unless you are acting as an employee on behalf of your employer or a postgraduate student of an affiliated institution which is paying any applicable article publishing charge ("APC") for Open Access articles. Where the Submitting Author wishes to make the Work available on an Open Access basis (and intends to pay the relevant APC), the terms of reuse of such Open Access shall be governed by a Creative Commons licence – details of these licences and which [Creative Commons](#) licence will apply to this Work are set out in our licence referred to above.

Other than as permitted in any relevant BMJ Author's Self Archiving Policies, I confirm this Work has not been accepted for publication elsewhere, is not being considered for publication elsewhere and does not duplicate material already published. I confirm all authors consent to publication of this Work and authorise the granting of this licence.

1  
2  
3  
4  
5  
6  
7  
8  
9  
10  
11  
12  
13  
14  
15  
16  
17  
18  
19  
20  
21  
22  
23  
24  
25  
26  
27  
28  
29  
30  
31  
32  
33  
34  
35  
36  
37  
38  
39  
40  
41  
42  
43  
44  
45  
46  
47  
48  
49  
50  
51  
52  
53  
54  
55  
56  
57  
58  
59  
60

# Gender and Other Potential Biases in Peer Review: Cross-sectional Analysis of 38,250 External Peer Review Reports

Anna Severin<sup>1,2</sup>, João Martins<sup>1,3</sup>, Rachel Heyard<sup>1</sup>, François Delavy<sup>1</sup>,  
Anne Jorstad<sup>1</sup>, Matthias Egger<sup>1,2</sup>

<sup>1</sup>Swiss National Science Foundation, Bern, Switzerland

<sup>2</sup> Institute of Social and Preventive Medicine, University of Bern, Bern, Switzerland

<sup>3</sup> European Research Council Executive Agency, Brussels, Belgium

Corresponding Author:

Professor Matthias Egger MD MSc FFPH

Swiss National Science Foundation

Wildhainweg 3

3001 Bern, Switzerland

matthias.egger@ispm.unibe.ch

Abstract 274 words, main text 3913 words, strengths and limitations 126 words, 1 figure, 3  
tables, 32 references, supplementary materials with 1 table, 5 figures and 1 text.

## ABSTRACT

**Objectives:** To examine whether the gender of applicants and peer reviewers and other factors influence peer review of grant proposals submitted to a national funding agency.

**Setting:** Swiss National Science Foundation (SNSF).

**Design:** Cross-sectional analysis of peer review reports submitted 2009 to 2016 using linear mixed effects regression models adjusted for research topic, applicant's age, nationality, affiliation and calendar period.

**Participants:** External peer reviewers.

**Primary outcome measure:** Overall score on a scale from 1 (worst) to 6 (best).

**Results:** Analyses included 38,250 reports on 12,294 grant applications from medicine, Architecture, Biology, Chemistry, Economics, Engineering, Geology, History, Linguistics, Mathematics, Physics, Psychology and Sociology submitted by 26,829 unique peer reviewers. In univariable analysis, male applicants received more favourable evaluation scores than female applicants (+0.18 points; 95% CI 0.14-0.23), and male reviewers awarded higher scores than female reviewers (+0.11; 95% CI 0.08-0.15). Applicant-nominated reviewers awarded higher scores than reviewers nominated by the SNSF (+0.53; 95% CI 0.50-0.56), and reviewers from outside of Switzerland more favourable scores than reviewers affiliated with Swiss institutions (+0.53; 95% CI 0.49-0.56). In multivariable analysis, differences between male and female applicants were attenuated (to +0.08; 95% CI 0.04-0.13) whereas results changed little for source of nomination and affiliation of reviewers. The gender difference increased after September 2011, when new evaluation forms were introduced (P=0.033 from test of interaction).

**Conclusions:** Peer review of grant applications at SNSF might be prone to biases stemming from different applicant and reviewer characteristics. The SNSF abandoned the nomination of peer reviewers by applicants. The new form introduced in 2011 may inadvertently have given more emphasis to the applicant's track record. We encourage other funders to conduct similar studies, in order to improve the evidence base for rational and fair research funding.

**Keywords:** peer review, bias, gender matching hypothesis, confounding, mixed effects models

## STRENGTHS AND LIMITATIONS OF THIS STUDY

- This study was based on a large sample of peer review reports on project proposals from medicine and other disciplines submitted to the national Swiss funding agency.
- It is one of a few studies examining the interaction between gender of main applicant and gender of reviewers and the 'gender matching hypothesis', as well as the influence of other characteristics of applicants.
- This study only examined scores from peer review, but not the determinants of the final funding decision or the level of funding. It is therefore unclear whether the differences in scores analysed in the present study influenced funding decisions.
- This study was carried out by researchers affiliated with the funding agency and not by an independent group of researchers.

## BACKGROUND

In public research funding, peer review of proposals by suitable experts is the accepted best practice for determining which projects are allocated funding. Peer review is an important element of quality assurance in the scientific community (1). Against this background, a wealth of literature is concerned with the question of the legitimacy of peer review decisions. Generally speaking, the legitimacy of funding decisions relies on a funder's ability to minimize bias in grant evaluations that results from factors that are unrelated to the actual quality of the grant applications (2).

Mandated by the Swiss Confederation, the Swiss National Science Foundation (SNSF) supports basic research and use-inspired basic research in all academic disciplines. The SNSF started monitoring its evaluation processes in 2006. The main funding scheme of the SNSF is project funding, which provides support to independent researchers who propose research on self-chosen topics (3). The proposals submitted to the SNSF are peer reviewed by at least two external experts.

Empirical studies suggest that the evaluation of applications is prone to biases that may relate to both applicant and reviewer characteristics (2)(4). Potential discrimination against women is the most frequently investigated bias in the context of grant peer review (5). In a natural experiment, a recent study of the Canadian Institutes of Health Research compared grant programmes with and without an explicit review of the track record of the principal investigator (6). The results showed that the gender gap in grant funding was due to less positive assessments of women as principal investigators, whereas the quality of the proposed research was similar for women and men (6). Of note, the SNSF introduced new evaluation forms and guidelines for peer reviewers in September 2011, which we describe in the Methods section.

The source of nomination of reviewers was also of interest: the foundation allowed grant applicants to suggest reviewers to evaluate submissions via a "positive list". The names put forward on the list were then considered as potential reviewers, after a careful check for conflicts of interest (CoI). A study of the Australian Research Council found that applicant-nominated reviewers tended to give better ratings than panel-nominated reviewers (7). Finally, the SNSF frequently invites reviewers from abroad to review grant applications. An analysis of data from the Austrian Science Fund suggested that international peer reviewers

1  
2  
3 affiliated with research institutions located in countries known for high scientific productivity  
4  
5 were generally more stringent than national reviewers (8).  
6

7 To gain insights into gender and other potential biases in peer review, we analysed the  
8  
9 database of the SNSF to examine the determinants of overall scores from external peer  
10  
11 reviewers in project funding.  
12  
13  
14  
15

## 16 **METHODS**

### 17 **Evaluation of Grant Applications at the SNSF**

18  
19 The evaluation consists of four steps (3). The administrative office first checks eligibility and  
20  
21 assigns grant applications to two members of the National Research Council (referee and co-  
22  
23 referee) based on their field of expertise. Second, eligible proposals are peer-reviewed by  
24  
25 external experts. External reviewers were identified in several ways: (i) grant applicants  
26  
27 suggested experts via a “positive list”, (ii) the referee of the National Research Council  
28  
29 suggested reviewers, (iii) the SNSF administrative offices proposed experts, and (iv) experts  
30  
31 who declined to review suggested other reviewers (3). For each application, at least two  
32  
33 external independent reviews were required.  
34  
35

36 The final choice of reviewers was made by the SNSF. Reviewers from the positive list were  
37  
38 chosen only if they had the required expertise and there were no CoI. To exclude any CoI,  
39  
40 SNSF employees checked whether reviewers had submitted an application for the same call,  
41  
42 whether they had published with the applicants in the past five years and whether they work  
43  
44 at the same institution or in a closely associated unit. Applicants could also submit a  
45  
46 “negative list” of reviewers who, because of a possible CoI, should not be contacted.  
47  
48 Providing a positive or a negative list was optional and the lists could include one or several  
49  
50 names.  
51

52 The peer review forms and assessment scale were changed in September 2011 to simplify  
53  
54 the review, and to achieve a more equal distribution of scores, with fewer proposals in the  
55  
56 top category. Up to September 2011, peer reviewers were asked to score six criteria: (1)  
57  
58 current scientific interest and impact of the project; (2) originality of the work; (3) suitability  
59  
60 of the methods; (4) work plan, feasibility, cost; (5) experience and past performance of the  
applicants; and (6) specific abilities of the investigators for the proposed project. Reviewers



1  
2  
3 were asked to “give a rating and provide explanatory comments” for each of the six criteria.  
4  
5 In September 2011, new evaluation forms were introduced (3)(9), which asked experts to  
6  
7 review proposals according to three criteria: 1) the applicants’ scientific track-record and  
8  
9 expertise; 2) the scientific relevance, originality and topicality of the proposed research and,  
10  
11 in the case of use-inspired research, the research’s broader impact; and 3) the suitability of  
12  
13 the methods and feasibility. Furthermore, peer reviewers were asked to declare any CoI, and  
14  
15 given the opportunity to submit confidential comments, which would not be seen by the  
16  
17 applicants. Up to September 2011, reviewers scored each criterion and the proposal overall  
18  
19 on a scale from 1 to 6: (1) poor, (2) satisfactory, (3) average, (4) good, (5) very good, and (6)  
20  
21 excellent. In September 2011 the scale was changed to (1) poor, (2) average, (3) good, (4)  
22  
23 very good, (5) excellent, and (6) outstanding. The two versions of the peer review form are  
24  
25 reproduced in supplementary Text S1. Applications were not blinded and reviewers were  
26  
27 therefore aware of applicant’s gender and their track records.

28 In the third step of the evaluation, the two members of the Council (referee and co-referee)  
29  
30 assessed the usefulness of the peer review reports and considered them when ranking the  
31  
32 application relative to other proposals. In the fourth and final step, referee and co-referee  
33  
34 presented their assessment at the meeting of the corresponding section of Council. Each  
35  
36 application was then voted on and approved or rejected (3).

### 37 **Data and Variables**

38  
39 We analysed the overall scores of external peer review reports submitted from 2009 to  
40  
41 2016. The outcome variable of interest was the overall evaluation score of a grant  
42  
43 application given by external reviewers. The evaluation score ranged from 1 (worst) to 6  
44  
45 (best). Explanatory variables included meta-data on principle applicants and external peer  
46  
47 reviewers, including source of reviewer (applicant-nominated vs. SNSF- nominated), gender  
48  
49 of the applicant and gender of the reviewer (female vs. male) and country of affiliation of the  
50  
51 reviewer (Switzerland vs. other). The mean ratio of female to male reviewers per grant  
52  
53 application was 0.2. Eighteen percent of the grant applications had male-only external  
54  
55 reviewers while only 1% had female-only external reviewers. SNSF-nominated experts  
56  
57 included reviewers who were proposed by the referee, the SNSF office or by experts who  
58  
59 declined to review. We also considered the research topic of a grant application, type of  
60

1  
2  
3 institutional affiliation and age of the applicant. Finally, we introduced a dummy variable to  
4 group applications submitted before and after September 2011.  
5  
6

### 7 **Statistical Analysis**

8  
9  
10 We used a linear mixed effects model to examine the effect of explanatory variables on the  
11 overall peer-review scores (10). This model was chosen because the data are clustered and  
12 hierarchical (11). Grant applications received two or more independent reviews, some  
13 reviewers had reviewed more than one application and many applicants had submitted  
14 more than one grant application over the study period, causing evaluation scores to be  
15 clustered at the levels of research projects, reviewers and applicants. We therefore  
16 introduced random intercepts for the identifiers of the reviewer, the applicant and the  
17 project in the model, thus taking into account the dependence between clustered scores  
18 (12).  
19  
20  
21  
22  
23  
24  
25

26  
27 We ran crude and adjusted models. The latter were adjusted for gender of the applicant and  
28 reviewer, source of reviewers, country of affiliation of the reviewer, the applicant's age (per  
29 10 year increase), affiliation (Swiss Federal Institutes of Technology and associated  
30 institutions [ETH domain], Cantonal university, other) and nationality (Swiss vs. other), the  
31 field of research (12 categories), and the period of submission of the proposal (before or  
32 after the change in peer review forms and scale). To make adjusted and crude estimates  
33 comparable, we performed a complete case analysis by deleting peer review reports with  
34 missing values for any of the relevant variables. The complete case data included 37,979  
35 reviews (99.3%). In further analyses, we examined interactions between the gender of the  
36 applicant and the gender of the reviewer, and other variables, by including interaction terms  
37 in the linear mixed models. We thus examined the 'gender matching hypothesis', which  
38 stipulates that female peer reviewers give higher scores to female researchers and that male  
39 reviewers do the same for male applicants (13). We used likelihood ratio tests to assess the  
40 strength of the evidence for interactions.  
41  
42  
43  
44  
45  
46  
47  
48  
49  
50  
51

52  
53 We present crude and adjusted regression coefficients, which reflect differences in peer  
54 review scores with their 95% confidence interval (CI). The notebook of the analysis, including  
55 a summary of the different statistical models, is available online at [www.git.io/fhaJx](http://www.git.io/fhaJx).  
56  
57  
58  
59  
60

## Patient and Public Involvement

This analysis was based on peer review reports submitted to a national research funder. No patients were involved in developing the research question, outcome measures and overall design of the study. Due to the anonymous nature of the data, we were unable to disseminate the results of the research directly to study participants.

## RESULTS

We analysed the summary scores of 38,250 external peer review reports on 12,294 project grant applications across all disciplines that were submitted 2006 to 2016 by 26,829 unique reviewers from Switzerland and abroad. The average number of reviews per grant application was 3.1, applicants submitted an average of 2.1 grant applications and reviewers reviewed an average of 1.4 applications. The complete case mixed effects regression analyses were based on 37,989 reviews (99.3%).

### Applicant characteristics

The 12,294 proposals were submitted by 5,820 applicants: 4,514 (77.6%) men and 1,306 (22.4%) women ([Table 1](#)). Most applicants were based at Cantonal universities, were Swiss, and the largest number was from medicine. Female applicants were younger than men and more likely to be affiliated with other institutions (for example universities of applied sciences, the arts or teacher education) than with the Federal ETH domain or the Cantonal universities. Women were also more likely to work in medicine, the social sciences and humanities (psychology, sociology, linguistics) than in STEM disciplines (Science, Technology, Engineering, and Mathematics) or biology ([Table 1](#)).

### Peer review scores across groups of applicants and reviewers

Distributions of overall peer review scores were somewhat skewed, with applications more frequently being awarded high evaluation scores than low scores (see notebook at [www.git.io/fhaJx](http://www.git.io/fhaJx)). Male principle applicants received higher evaluation scores than female principle applicants ([Table 2](#)). Similarly, the analysis of evaluation scores by gender of the reviewer showed that male reviewers tended to award higher scores than female reviewers. Applicant-nominated reviewers awarded higher scores than SNSF-nominated reviewers, and

1  
2  
3 reviewers affiliated with institutions outside Switzerland awarded higher evaluation scores  
4  
5 than reviewers affiliated with Swiss institutions.  
6

7 To further explore gender differences in peer review scores, we stratified analyses of peer  
8 review reports by research field, applicant age and applicant affiliation. There were  
9 important differences in evaluation scores across research fields. Grant applications in the  
10 natural and technical sciences or in linguistics and history received higher evaluation scores  
11 than applications from medicine, sociology or psychology (supplementary [Figure S1](#)). Gender  
12 differences in scores were more pronounced for some research topics (for example  
13 mathematics and physics and engineering, biology and medicine, sociology) than others (for  
14 example geology, history, psychology). Female applicants were underrepresented (below 50  
15 percent) in all research topics (lower panel of supplementary [Figure S1](#)).  
16  
17

18 Applicants aged 60 years or older received the highest evaluation scores, independent of  
19 their gender. For the younger age groups, female applicants consistently received lower  
20 evaluation scores than male applicants (supplementary [Figure S2](#)). Female applicants were  
21 under represented across all age groups, except for the youngest age group, and  
22 representation was particularly low in older age groups (lower panel of supplementary  
23 [Figure S2](#)). Applications submitted by applicants affiliated with the ETH Domain received  
24 higher evaluation scores than applications from Cantonal universities or from other research  
25 institutions. Gender differences in scores were evident for all three affiliations, and women  
26 were under represented for all affiliations (supplementary [Figure S3](#)).  
27  
28

29 Analysis of the nationality of the applicant showed that grant applications submitted by  
30 Swiss applicants received slightly lower scores than those submitted by applicants with other  
31 nationalities, with a similar gap between genders (supplementary [Figure S4](#)). Finally,  
32 supplementary [Figure S5](#) shows that applications submitted before the new forms were  
33 introduced received higher scores than applications evaluated later.  
34  
35

### 36 **Linear Mixed-Effects Models**

37 [Table 3](#) shows crude and adjusted differences in peer review scores by characteristics of  
38 applicants, reviewers and research proposals. In the crude model, the difference between  
39 male and female applicants was 0.18 points favouring men. More substantial differences of  
40 0.53 points were observed for source of reviewer (0.53 points higher if the reviewer was  
41 nominated by the applicants) and country of affiliation of the reviewer (0.53 higher for  
42  
43  
44  
45  
46  
47  
48  
49  
50  
51  
52  
53  
54  
55  
56  
57  
58  
59  
60

1  
2  
3 reviewers from outside Switzerland). Substantial differences were also observed across  
4 disciplines. For example, scores were on average 0.68 points higher in mathematics and  
5 physics than in medicine, but 0.12 point lower in psychology than in medicine ([Table 3](#)).  
6  
7 Compared to crude differences, most adjusted differences were smaller. For example, the  
8 adjusted difference between male and female applicants was reduced from 0.18 to 0.08  
9 points. One exception was the difference observed between proposals evaluated before or  
10 after the introduction of the peer review forms in September 2011 (0.43 points higher scores  
11 before the introduction in both analyses).  
12  
13  
14  
15  
16  
17

### 18 **Interactions between gender of the applicants and other variables**

19  
20 We examined possible interactions between the genders of the applicants with the other  
21 fixed-effect variables in the model shown in [Table 2](#). In other words, we examined whether  
22 the differences observed between female and male applicants varied across the levels of the  
23 other variables. We found that male reviewers gave higher scores both to male and female  
24 applicants than female reviewers, but this difference was considerably greater for male than  
25 for female applicants. [Figure 1](#) shows the predicted values of the overall score from the  
26 bivariable model ( $P=0.011$  from test of interaction). There was some evidence that the  
27 gender difference in scores became larger after the introduction of the new evaluation form  
28 ( $P=0.065$ , [Figure 1](#)). There was also strong evidence for an interaction ( $P<0.0001$ ) between  
29 gender of the first applicant and his or her affiliation: the gender differences in scores were  
30 smallest for applicants based at one of the Cantonal universities, larger for the ETH domain  
31 and most pronounced for other institutions of higher education (for example universities of  
32 applied sciences, the arts or teacher education, see [Figure 1](#)). The interaction P values from  
33 the adjusted models were 0.037 (gender of peer reviewer), 0.003 (affiliation of applicant)  
34 and 0.033 (change of evaluation form). All P values from the bivariable and multivariable  
35 interaction tests are shown in supplementary [Table S1](#).  
36  
37  
38  
39  
40  
41  
42  
43  
44  
45  
46  
47  
48  
49  
50  
51  
52  
53  
54  
55  
56  
57  
58  
59  
60

## DISCUSSION

This study of 38,250 distinct grant reviews on 12,294 different applications across all disciplines, which were submitted to the SNSF between 2009 and 2016 by 5,832 unique applicants is to the best of our knowledge one of the largest studies of peer review reports on research proposals ever conducted.

We show that female applicants received lower scores than male applicants. The gender difference was attenuated in multivariable analysis: it was partly explained by the fact that women were under represented among applicants in the fields and institutions whose proposals were rated highly, for example mathematics and physics, and institutions of the ETH domain. Our finding is in line with the meta-analysis of 21 studies by Bornmann et al., who found small but robust gender differences in grant award procedures with men globally having greater odds of receiving grants than women (30). Of note, applying a different statistical method, Marsh et al. found no gender differences for most effect sizes from Bornmann et al. (31). Kaatz et al. using data from the National Institutes of Health (NIH) did a text analysis of critiques for funded and unfunded NIH grant applications at the University of Wisconsin-Madison and found that reviewers assigned significantly worse scores for research approach, significance and priority to female than male applicants. The authors concluded that reviewers implicitly hold male and female applicants to different standards of evaluation (32).

Although a statistically substantial proportion of the gender gap in our study was explained by other factors, these factors might be a reflection of the leaky pipeline, i.e. “the phenomenon of women dropping out of research and academic careers at a faster rate than men” (14), which is well documented for Switzerland (15,16). The academic pipeline in Switzerland is particularly leaky in the life sciences, social sciences and humanities. In STEM the rate of dropout of women is less pronounced, but they are a minority from the start: among PhD students only about 20% are women, whereas in the social sciences, humanities, and the life sciences the majority of doctoral students are women (16).

Ceci and Williams (17) have argued that several factors are responsible for the under representation of women, including fertility choices and work-home balance issues, which affect women in all fields, not just STEM, whereas other factors such as career preferences and gender differences in mathematics achievement and attitudes impact particularly

1  
2  
3 women in math-based fields. The latter may in turn be influenced by cultural stereotypes  
4 and gender roles that lead to socialization processes that shape performance (18,19). In  
5 Switzerland, men are assigned the role of 'main breadwinner', resulting in uneven  
6 distribution of housework, unfavourable fiscal policies for households with two earners, and  
7 a lack of affordable child care (15,20). At the same time, the post-doc "bubble" in  
8 Switzerland is taking place in a situation of full employment and relative shortage of skilled  
9 labour (21).

10  
11 A noteworthy finding of our study was the interaction between the gender of applicants and  
12 peer reviewers. In contrast to Jayasinghe and colleagues (13), who analysed 7,153 reviewer  
13 ratings at the Australian Research Council large grant programme and other smaller studies  
14 (22)(23), we found evidence supporting the 'gender matching hypothesis'. Male reviewers  
15 gave systematically higher ratings to male applicants than to female applicants, whereas the  
16 same phenomenon could not be observed for female reviewers. One possible explanation is  
17 that, if such matching bias was present, male reviewers will have favoured male applicants,  
18 despite the fact that the proposals from male and female applicants might have been of  
19 similar quality. Alternatively, assuming proposals from male applicants were in fact stronger,  
20 female reviewers could have been biased against men and downgraded their proposals.

21  
22 Male reviewers may have given more weight to the track record of applicants than female  
23 reviewers. In this context, it is interesting that the gender gap became wider after  
24 September 2011, when new evaluation forms for external peer review were introduced. The  
25 new guidelines and form separated the criteria related to the applicants, and the criteria  
26 related to the proposed project. On the new form, the applicant's track record was the first  
27 criterion out of a total of three, whereas it was the fifth out of six criteria on the old form.  
28 Although this was not intended, the reform may have led to reviewers giving more weight to  
29 the track record of applicants, due to its prominence on the new form. Based on a Canadian  
30 Institutes of Health Research study, which showed that the gender gap in grant funding was  
31 due to less positive assessments of women as principal investigators whereas the quality of  
32 the proposed research was similar for women and men (6), Raymond and Goodman asked  
33 funders to "evaluate projects, not people" (24). We are planning additional analyses to  
34 examine whether at the SNSF the same phenomenon is at play, i.e. whether the gender gap  
35 is driven by the assessments of the track record. Furthermore, the SNSF is discussing  
36 changes to the peer review form.

1  
2  
3 Our results confirm those from the Australian Research Council, which showed that  
4 applicant-nominated reviewers tended to give substantially higher ratings than panel-  
5 nominated reviewers (7). A study of peer review in biomedical journals also found that  
6 author-nominated reviewers submitted more favourable recommendations than editor-  
7 nominated reviewers (25). This difference may be interpreted in several ways. First,  
8 nominated reviewers may have a CoI that remained undetected in the SNSF CoI  
9 examination. Alternatively, applicants may nominate reviewers who are more familiar with  
10 their field than reviewers nominated by the SNSF, and thus more able to recognize the  
11 impact and importance of the proposed research. Like the Australian Research Council, the  
12 SNSF felt that bias was the most likely explanation and decided to discontinue the use of the  
13 “positive list” in 2016. Of note, applicants can still submit a “negative list” of reviewers that  
14 should not be used because of perceived CoI.

15  
16 Peer reviewers affiliated with a Swiss research institution gave lower scores than reviewers  
17 from outside Switzerland. A study of the Austrian Science Fund suggested that reviewers  
18 from countries with high scientific productivity were more stringent than national reviewers  
19 (8). Switzerland belongs to the most productive countries in terms of research output (26)  
20 and this might explain why reviewers affiliated with Swiss research institutions award lower  
21 evaluation scores than reviewers from abroad. In contrast to the Austrian Science Fund  
22 study (8), the Australian data showed that reviewers affiliated with an institution in the  
23 United States of America (USA) were more lenient than reviewers affiliated with institutions  
24 located in the United Kingdom, Germany or Australia (27), despite the fact that the USA is  
25 the country with the highest research output globally (26). Other explanations for the lower  
26 scores awarded by Swiss reviewers include greater knowledge of the local research capacity  
27 and expertise, or bias, if reviewers based in Switzerland downgraded the proposals of their  
28 competitors.

29  
30 Our study has several limitations. First and most importantly, we did not examine the  
31 determinants of the final funding decision or the level of funding. It is therefore unclear  
32 whether the differences in scores analysed in the present study influenced funding  
33 decisions. Such analyses are planned for the future. Second, this is an observational study  
34 and it is therefore difficult to infer causality from the associations observed. Chance, bias,  
35 and confounding variables must be considered as possible explanations for associations  
36 between reviewer and applicant characteristics and overall scores (28). We tried to control



1  
2  
3 the influence of confounding variables by adjusting for these in regression models. We are  
4 considering randomized experiments to test certain interventions (e.g., blinding) in order to  
5 prevent or reduce gender effects for the future. Third, our results are relevant to the Swiss  
6 context, but may not be applicable to other countries. Fourth, we did not attempt to rate the  
7 expertise of the reviewers, and adjust for the differences in individual reviewers scores based on  
8 their previous performance. Fifth, this study was carried out by researchers affiliated with the  
9 SNSF and not by an independent research institution. As studies might be influenced by the  
10 expectations of the researchers of the study, the credibility of the results might be reduced. We  
11 address this by making the data available for replication. Finally, we examined project funding  
12 only, but not career funding or programme funding.  
13  
14  
15  
16  
17  
18  
19  
20  
21  
22

## 23 **CONCLUSIONS**

24  
25  
26 In conclusion, our results had important implications for the evaluation of project grant  
27 proposals: we abandoned the nomination of peer reviewers by applicants, and make  
28 members of evaluation panels aware of the other factors, including the gender and  
29 affiliation of reviewers, that can influence review scores. We encourage all funding bodies to  
30 contribute to research on potential biases in research funding, and ways of preventing them  
31 (29).  
32  
33  
34  
35  
36  
37  
38  
39  
40  
41  
42  
43  
44  
45  
46  
47  
48  
49  
50  
51  
52  
53  
54  
55  
56  
57  
58  
59  
60

## FOOTNOTES

**Acknowledgements:** Earlier results from this analysis were presented at the 5th International Congress on Peer Review and Scientific Publication, Chicago, Illinois, USA; September 10-12, 2017. We are grateful to Angelika Kalt, Benjamin Rindlisbacher and Barbara Curdy-Korrodi for helpful comments on previous versions of this paper, and to Andreas Limacher and Lukas Bütikofer (Clinical Trials Unit of the Faculty of Medicine of the University of Bern) for advice on the statistical analyses.

**Contributors:** AS, JM and ME conceived the study. JM and RH performed statistical analyses. FD and AJ contributed to data management and statistical analyses. AS and JM wrote the first draft of the paper, which was revised by ME, AS and RH. All authors contributed to and approved the final version.

**Funding:** This work was supported by the SNSF (internal funds and grant number 174281).

**Competing interests:** The authors are employees of the SNSF; they declare that they have no other competing interests.

**Patient consent:** Not applicable.

**Ethics approval:** Under Swiss law, not ethics approval is required for this type of study. Peer reviewers did not provide consent. No peer reviewer, applicant or proposal can be identified from this report.

**Data sharing statement:** The data analysed in this study are available to others on request for an approved research project, after signing a data sharing agreement.

## References

1. Harman G. The Management of Quality Assurance: A Review of International Practice. *Higher Education Quarterly* 52(4):345 - 364. 2002;52(4):345–64.
2. Bornmann L, Daniel H-D. Gatekeepers of science - Effects of external reviewers' attributes on the assessments of fellowship applications. *J Informetr.* 2007 Jan;1(1):83–91.
3. Swiss National Science Foundation. Funding Regulations. Regulations of the Swiss National Science Foundation on research grants. Version 1.1.2016 [Internet]. 2016. Available from: [http://www.snf.ch/SiteCollectionDocuments/allg\\_reglement\\_16\\_e.pdf](http://www.snf.ch/SiteCollectionDocuments/allg_reglement_16_e.pdf)
4. Demicheli V, C DP. Peer review for improving the quality of grant applications ( Review ). 2008;(2).
5. Mutz R, Bornmann L, Daniel H-D. Does Gender Matter in Grant Peer Review? An Empirical Investigation Using the Example of the Austrian Science Fund. *Z Psychol-J Psychol.* 2012;220(2):121–9.
6. Witteman HO, Hendricks M, Straus S, Tannenbaum C. Are gender gaps due to evaluations of the applicant or the science? A natural experiment at a national funding agency. *The Lancet.* 2019 Feb;393(10171):531–40.
7. Marsh HW, Bonds NW, Jayasinghe UW. Peer review process: Assessments by applicant-nominated referees are biased, inflated, unreliable and invalid. *Aust Psychol.* 2007 Mar;42(1):33–8.
8. Fischer C, Reckling FJ. Factors Influencing Approval Probability in Austrian Science Fund (FWF) Decision-Making Procedures - FWF Stand-Alone Projects Programme, 1999 to 2008 [Internet]. Rochester, NY: Social Science Research Network; 2010 Dec [cited 2019 May 5]. Report No.: ID 1725985. Available from: <https://papers.ssrn.com/abstract=1725985>
9. Project funding - SNF [Internet]. [cited 2019 May 25]. Available from: <http://www.snf.ch/en/theSNSF/evaluation-procedures/project-funding/Pages/default.aspx>
10. Bates D, Maechler M, Bolker BM, Walker SC. Fitting Linear Mixed-Effects Models Using lme4. *J Stat Softw.* 2015 Oct;67(1):1–48.
11. Jayasinghe UW, Marsh HW, Bond N. A multilevel cross-classified modelling approach to peer review of grant proposals: the effects of assessor and researcher attributes on assessor ratings. *Journal of the Royal Statistical Society: Series A (Statistics in Society).* 2003 Oktober;166(3):279–300.
12. Harrison XA, Donaldson L, Correa-Cano ME, Evans J, Fisher DN, Goodwin CED, et al. A brief introduction to mixed effects modelling and multi-model inference in ecology. *PeerJ.* 2018;6:e4794.
13. Jayasinghe UW, Marsh HW, Bond N. A multilevel cross-classified modelling approach to peer review of grant proposals: the effects of assessor and researcher attributes on assessor ratings. *J Royal Statistical Soc A.* 2003 Oct;166(3):279–300.
14. Directorate-General for Research and Innovation. She Figures 2015 [Internet]. 2015. 224 p. Available from: [https://ec.europa.eu/research/swafs/index.cfm?pg=library&lib=gender\\_equality](https://ec.europa.eu/research/swafs/index.cfm?pg=library&lib=gender_equality)

15. Bataille P, Le Feuvre N, Morales SK. Should I stay or should I go? The effects of precariousness on the gendered career aspirations of postdocs in Switzerland. *Eur Educ Res J*. 2017 May;16(2–3):313–31.
16. Schubert F, Engelage S. Wie undicht ist die Pipeline? Wissenschaftskarrieren von promovierten Frauen. *Köln Z Soziol*. 2011 Sep;63(3):431–57.
17. Ceci SJ, Williams WM. Understanding current causes of women's underrepresentation in science. *Proc Natl Acad Sci U S A*. 2011 Feb 22;108(8):3157–62.
18. Else-Quest NM, Hyde JS, Linn MC. Cross-national patterns of gender differences in mathematics: A meta-analysis. *Psychological Bulletin*. 2010 Jan;136(1):103–27.
19. Eagly AH, Steffen VJ. Gender Stereotypes Stem From the Distribution of Women and Men Into Social Roles. :20.
20. Domestic activities (time used in) - UNECE Statistical Glossary - UNECE Statswiki [Internet]. [cited 2019 May 12]. Available from: <https://statswiki.unece.org/pages/viewpage.action?pageId=92211215>
21. Wanner P, Zufferey J, Fioretta J. The impact of migratory flows on the Swiss labour market. A comparison between in- and outflows. *Migr Lett*. 2016 Sep;13(3):411–26.
22. Bornmann L, Daniel H-D. Gatekeepers of science—Effects of external reviewers' attributes on the assessments of fellowship applications. *Journal of Informetrics*. 2007 Jan;1(1):83–91.
23. Sonnert G. What Makes a Good Scientist?: Determinants of Peer Evaluation among Biologists. *Social Studies of Science*. 1995;25(1):35–55.
24. Raymond JL, Goodman MB. Funders should evaluate projects, not people. *The Lancet*. 2019 Feb;393(10171):494–5.
25. Schroter S, Tite L, Hutchings A, Black N. Differences in review quality and recommendations for publication between peer reviewers suggested by authors or by editors. *JAMA-J Am Med Assoc*. 2006 Jan 18;295(3):314–7.
26. Country outputs | Nature Index [Internet]. [cited 2019 May 14]. Available from: <https://www.natureindex.com/country-outputs>
27. Wood F. The peer review process [Internet]. Canberra: Australian Govt. Pub. Service; 1997 [cited 2019 May 5] p. 189. Available from: <https://trove.nla.gov.au/version/45600880>
28. Smith GD, Ebrahim S. Data dredging, bias, or confounding - They can all get you into the BMJ and the Friday papers. *Br Med J*. 2002 Dec 21;325(7378):1437–+.
29. Tricco AC, Thomas SM, Antony J, Rios P, Robson R, Pattani R, et al. Strategies to Prevent or Reduce Gender Bias in Peer Review of Research Grants: A Rapid Scoping Review. *PLoS One*. 2017 Jan 6;12(1):e0169718.
30. Bornmann L, & Mutz R, & Daniel HD, Gender differences in grant peer review: A meta-analysis. *Journal of Informetrics* 2007;1(3):226–238.
31. Marsh HW, Bornmann L, Mutz R, Daniel HD & O'Mara A. Gender Effects in the Peer Reviews of Grant Proposals: A Comprehensive Meta-Analysis Comparing Traditional and Multilevel

1  
2  
3  
4  
5  
6  
7  
8  
9  
10  
11  
12  
13  
14  
15  
16  
17  
18  
19  
20  
21  
22  
23  
24  
25  
26  
27  
28  
29  
30  
31  
32  
33  
34  
35  
36  
37  
38  
39  
40  
41  
42  
43  
44  
45  
46  
47  
48  
49  
50  
51  
52  
53  
54  
55  
56  
57  
58  
59  
60

Approaches. Review of Educational Research 2009;79(3):1290-1326.  
doi:10.3102/0034654309334143.

- 32. Kaatz A, Lee Y-G, Potvien A, Magua W, Filut A, Bhattachary A, Leatherberry RX, DCarnes M. Analysis of NIH R01 Application Critiques, Impact and Criteria Scores: Does the Sex of the Principal Investigator Make a Difference? Academic Medicine 2016;91(8):1080-1088.

For peer review only

1  
2  
3 **Legend to Figure**  
4  
5  
6

7 **Figure 1: Gender differences in external evaluation scores by gender of the expert**  
8 **reviewer, affiliation and period of submission of the proposal.**  
9

10 Predicted values from bivariable (unadjusted) model are shown, together with their 95%  
11 confidence intervals. Scores range from 1 (worst) to 6 (best). Average (mean) overall scores  
12 are shown, horizontal lines indicate Wald 95% confidence intervals.  
13  
14  
15  
16  
17  
18  
19  
20  
21  
22  
23  
24  
25  
26  
27  
28  
29  
30  
31  
32  
33  
34  
35  
36  
37  
38  
39  
40  
41  
42  
43  
44  
45  
46  
47  
48  
49  
50  
51  
52  
53  
54  
55  
56  
57  
58  
59  
60

For peer review only

**Table 1. Characteristics of applicants who submitted grant applications to the Swiss National Science Foundation between 2009 and 2016, stratified by gender.**

|                          | Male applicants<br>(n = 4,514, 78%) | Female applicants<br>(n = 1,306, 22%) |
|--------------------------|-------------------------------------|---------------------------------------|
| Age (mean, SD)           | 48.24 (8.63)                        | 46.23 (8.27)                          |
| <b>Affiliation</b>       |                                     |                                       |
| ETH Domain               | 1,195 (85%)                         | 219 (15%)                             |
| Other                    | 481 (68%)                           | 224 (32%)                             |
| Universities (reference) | 2,838 (77%)                         | 863 (23%)                             |
| <b>Nationality</b>       |                                     |                                       |
| Other than Swiss         | 1,896 (77%)                         | 573 (23%)                             |
| Swiss                    | 2,618 (78%)                         | 733 (22%)                             |
| <b>Field of research</b> |                                     |                                       |
| Medicine (reference)     | 1,029 (76%)                         | 317 (24%)                             |
| Architecture             | 146 (72%)                           | 56 (28%)                              |
| Biology                  | 611 (83%)                           | 129 (17%)                             |
| Chemistry                | 378 (83%)                           | 76 (17%)                              |
| Economics                | 290 (78%)                           | 84 (22%)                              |
| Engineering              | 527 (88%)                           | 74 (12%)                              |
| Geology                  | 144 (86%)                           | 24 (14%)                              |
| History                  | 209 (75%)                           | 68 (25%)                              |
| Linguistics              | 203 (67%)                           | 102 (33%)                             |
| Mathematics / Physics    | 491 (90%)                           | 56 (10%)                              |
| Psychology               | 223 (58%)                           | 164 (42%)                             |
| Sociology                | 263 (63%)                           | 156 (37%)                             |

The characteristics refer to the first submission of a project grant proposal during the study period. Numbers (%) are shown unless otherwise indicated. Analysis based on 5,820 unique applicants without missing values.

**Table 2: Mean of overall score by groups of applicants and peer reviewers.**

| Group                         | No. of peer review reports | Mean overall score (SD) |
|-------------------------------|----------------------------|-------------------------|
| Female Applicants             | 7,764                      | 4.42 (1.25)             |
| Male Applicants               | 30,455                     | 4.63 (1.22)             |
| Female Reviewers              | 7,591                      | 4.44 (1.26)             |
| Male Reviewers                | 30,659                     | 4.63 (1.22)             |
| Applicant-nominated Reviewers | 8,755                      | 5.12 (1.00)             |
| SNSF-nominated Reviewers      | 29,495                     | 4.43 (1.25)             |
| International-based Reviewers | 29,423                     | 4.71 (1.19)             |
| National-based Reviewers      | 8,604                      | 4.16 (1.28)             |

SD, standard deviation.

Results based on 38,250 peer review reports.



**Table 3: Crude and adjusted differences in external peer review evaluation scores by characteristics of applicants, reviewers and research proposals.**

| Variable                            | Number of reviews analysed | Unadjusted difference (95% CI) | P      | Adjusted difference (95% CI) | P      |
|-------------------------------------|----------------------------|--------------------------------|--------|------------------------------|--------|
| Gender of the applicant             |                            |                                | <0.001 |                              | <0.001 |
| Male                                | 30,263                     | 0.18 (0.14 – 0.23)             |        | 0.08 (0.04 – 0.13)           |        |
| Female                              | 7,716                      | 0                              |        | 0                            |        |
| Gender of the reviewer              |                            |                                | <0.001 |                              | <0.001 |
| Male                                | 30,442                     | 0.11 (0.08 – 0.15)             |        | 0.08 (0.05 – 0.11)           |        |
| Female                              | 7,537                      | 0                              |        | 0                            |        |
| Source of nomination of reviewer    |                            |                                | <0.001 |                              | <0.001 |
| Applicant                           | 8,688                      | 0.53 (0.50 – 0.56)             |        | 0.49 (0.46 – 0.51)           |        |
| Office                              | 29,291                     | 0                              |        | 0                            |        |
| Country of affiliation of reviewer  |                            |                                | <0.001 |                              | <0.001 |
| Outside Switzerland                 | 29,384                     | 0.53 (0.49 – 0.56)             |        | 0.47 (0.44 – 0.50)           |        |
| Switzerland                         | 8,595                      | 0                              |        | 0                            |        |
| Age of the applicant                | 37,989                     |                                | <0.001 |                              | <0.001 |
| Per 10 year increase                |                            | 0.06 (0.03 – 0.08)             |        | 0.05 (0.03 – 0.07)           |        |
| Affiliation of the applicant        |                            |                                | <0.001 |                              | <0.001 |
| ETH Domain                          | 9,960                      | 0.30 (0.26 – 0.34)             |        | 0.11 (0.07 – 0.16)           |        |
| Other                               | 4,075                      | -0.24 (-0.30 – -0.19)          |        | -0.19 (-0.25 – -0.14)        |        |
| Universities                        | 23,944                     | 0                              |        | 0                            |        |
| Nationality of the applicant        |                            |                                | 0.155  |                              | 0.143  |
| Other than Swiss                    | 16,545                     | 0.03 (-0.01 – 0.06)            |        | -0.03 (-0.06 – 0.01)         |        |
| Swiss                               | 21,434                     | 0                              |        | 0                            |        |
| Field of research                   |                            |                                | <0.001 |                              | <0.001 |
| Medicine                            | 7,540                      | 0                              |        | 0                            |        |
| Architecture                        | 1,391                      | 0.13 (0.03 – 0.24)             |        | 0.15 (0.05 – 0.25)           |        |
| Biology                             | 3,872                      | 0.30 (0.24 – 0.36)             |        | 0.27 (0.21 – 0.33)           |        |
| Chemistry                           | 3,244                      | 0.46 (0.39 – 0.53)             |        | 0.24 (0.17 – 0.31)           |        |
| Economics                           | 2,171                      | -0.09 (-0.17 – -0.01)          |        | -0.01 (-0.09 – 0.06)         |        |
| Engineering                         | 4,880                      | 0.32 (0.25 – 0.38)             |        | 0.07 (0.00 – 0.13)           |        |
| Geology                             | 1,167                      | 0.50 (0.39 – 0.60)             |        | 0.25 (0.14 – 0.35)           |        |
| History                             | 2,053                      | 0.35 (0.27 – 0.44)             |        | 0.32 (0.24 – 0.40)           |        |
| Linguistics                         | 2,244                      | 0.30 (0.22 – 0.38)             |        | 0.26 (0.18 – 0.34)           |        |
| Mathematics / Physics               | 3,979                      | 0.68 (0.62 – 0.75)             |        | 0.45 (0.39 – 0.52)           |        |
| Psychology                          | 2,458                      | -0.12 (-0.20 – -0.05)          |        | -0.08 (-0.15 – 0.00)         |        |
| Sociology                           | 2,980                      | -0.06 (-0.13 – 0.02)           |        | 0.01(-0.06 – 0.08)           |        |
| Introduction of reviewer guidelines |                            |                                | <0.001 |                              | <0.001 |
| Before introduction                 | 11,151                     | 0.44 (0.41 – 0.47)             |        | 0.43 (0.40 – 0.46)           |        |
| After introduction                  | 26,828                     | 0                              |        | 0                            |        |

95% CI, 95% confidence interval. Results from linear mixed effects models based on 37,979 complete peer review reports.

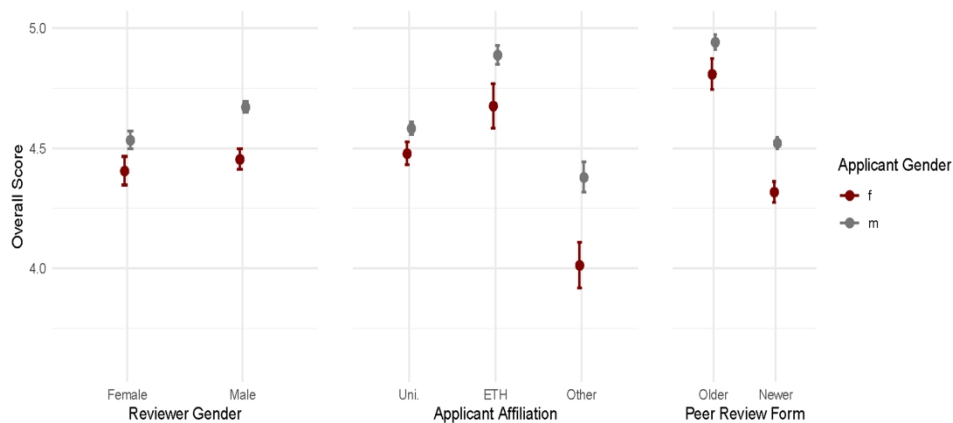

Figure 1: Gender differences in external evaluation scores by gender of the expert reviewer, affiliation and period of submission of the proposal.

Predicted values from bivariable (unadjusted) model are shown, together with their 95% confidence intervals. Scores range from 1 (worst) to 6 (best). Average (mean) overall scores are shown, horizontal lines indicate Wald 95% confidence intervals.

## Supplementary materials

**Table S1: P values from interaction tests of gender of the applicant with other variables, based on bivariable and multivariable models.**

|                                    | <b>Bivariable</b> | <b>Multivariable*</b> |
|------------------------------------|-------------------|-----------------------|
| Gender of reviewer                 | 0.011             | 0.037                 |
| Source of nomination of reviewer   | 0.71              | 0.17                  |
| Country of affiliation of reviewer | 0.57              | 0.27                  |
| Age of applicant                   | 0.74              | 0.67                  |
| Affiliation of the applicant       | <0.001            | 0.003                 |
| Nationality of the applicant       | 0.51              | 0.92                  |
| Research topic                     | 0.36              | 0.31                  |
| Change of guidelines               | 0.065             | 0.033                 |

\*Adjusted for all variables listed in Table 2 of the main paper.

Figure S1: Overall scores depending on research topic and gender of the applicant.

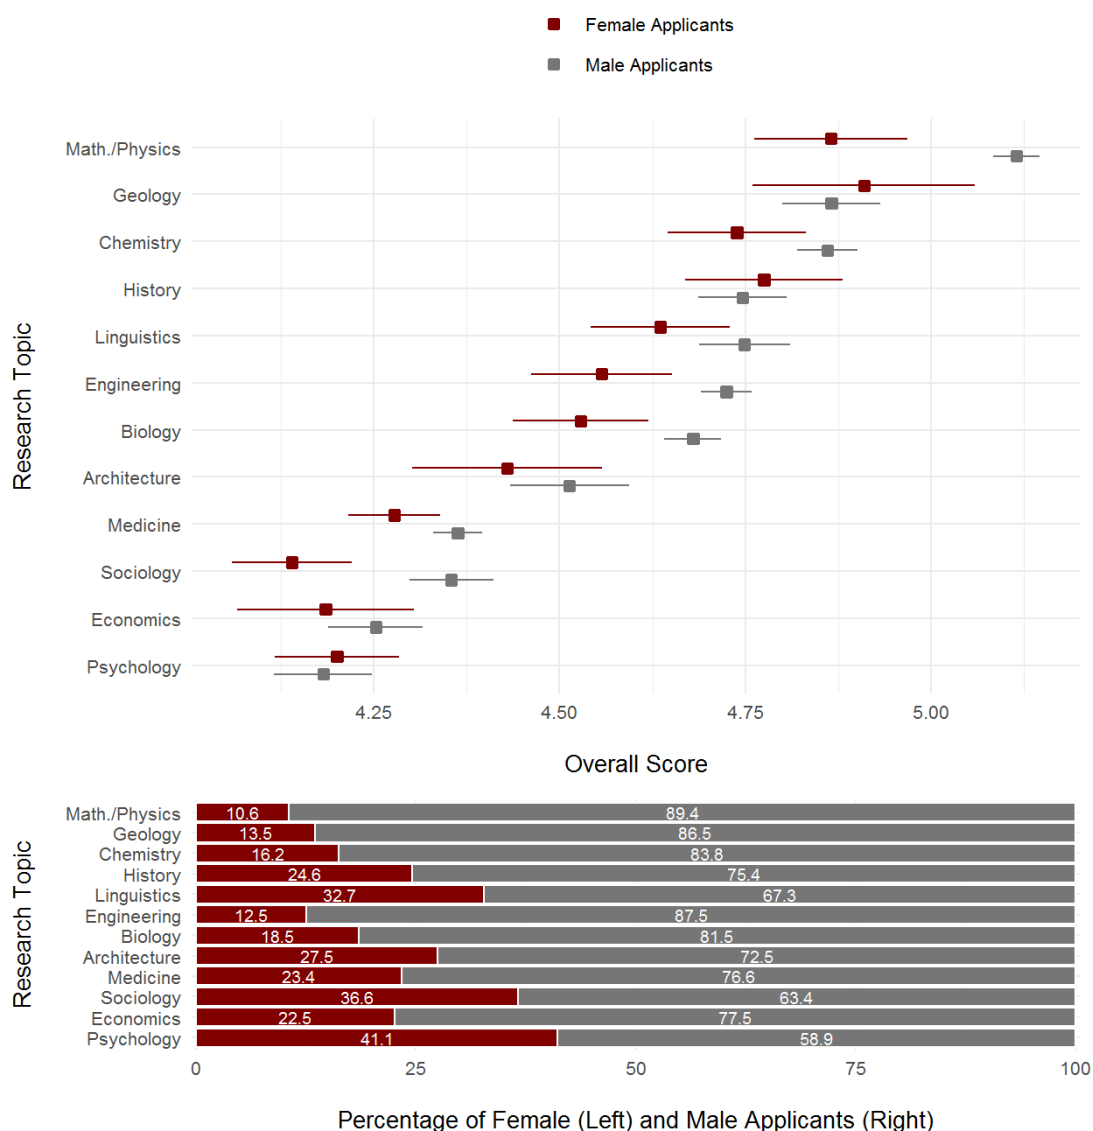

Upper panel: Average (mean) overall scores by research topic for female and male applicants; horizontal lines indicate Wald 95% confidence intervals. Lower panel: Gender distribution in the research topics.

Figure S2: Overall scores depending on the age and gender of the applicants.

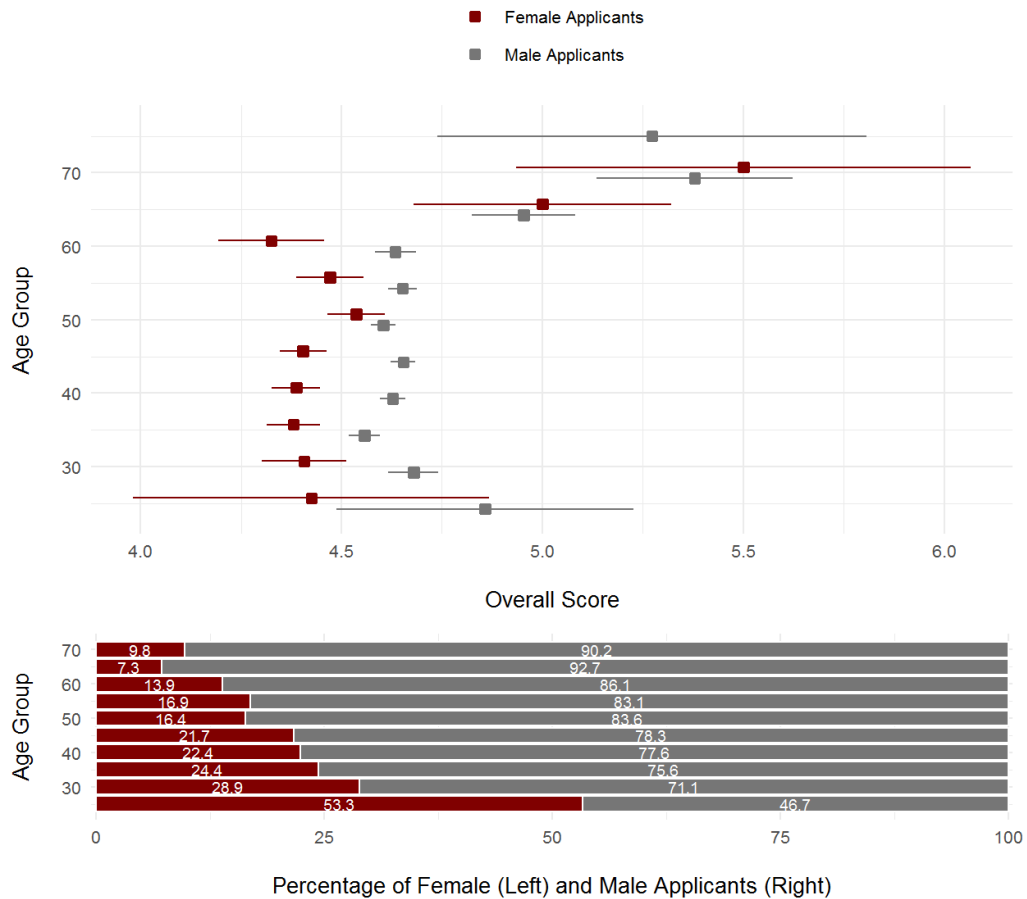

Upper panel: Average (mean) overall scores by five-year age group for female and male applicants; horizontal lines indicate Wald 95% confidence intervals. Lower panel: Gender distribution in the age groups.

Figure S3: Overall scores depending on the applicant's institution type and gender.

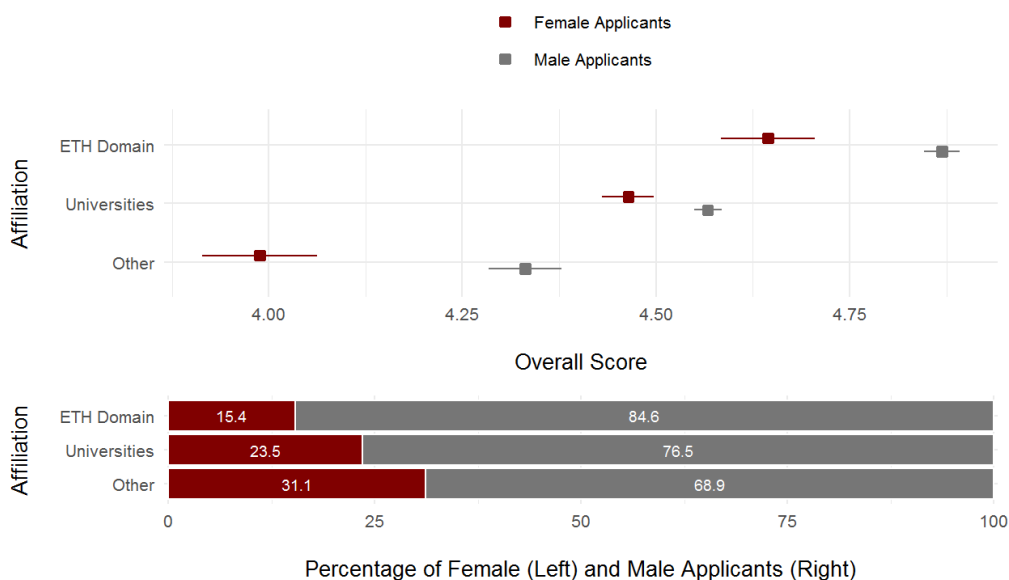

Upper panel: Average (mean) overall scores by affiliation times for female and male applicants; horizontal lines indicate Wald 95% confidence intervals. Lower panel: Gender distribution for the different affiliation types.

**Figure S4: Average overall scores by nationality for female and male applicant; horizontal lines indicate Wald 95% confidence intervals.**

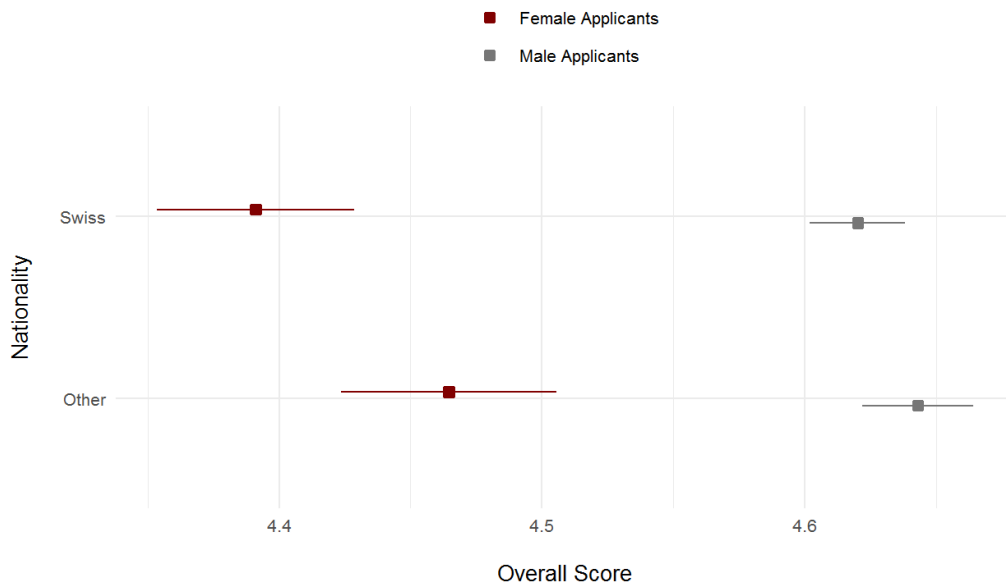

**Figure S5: Average (mean) overall scores by application call deadline for female and male applicants; horizontal lines indicate Wald 95% confidence intervals.**

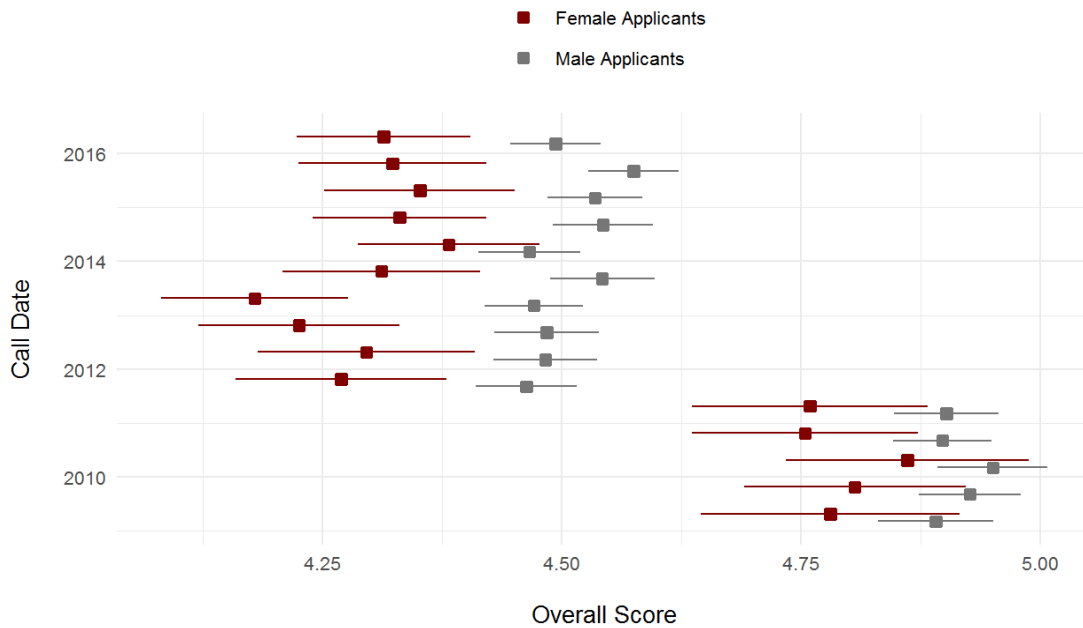

**Text S1: Old and new evaluation forms. The new forms were implemented from the 1. October 2011 call onwards.**

**OLD FORM**

**1. Synopsis**

|                                                               | <b>Excellent</b> | <b>Very Good</b> | <b>Good</b> | <b>Average</b> | <b>Satisfactory</b> | <b>Poor</b> | <b>Not considered</b> |
|---------------------------------------------------------------|------------------|------------------|-------------|----------------|---------------------|-------------|-----------------------|
| Current scientific interest and impact of the project         |                  |                  |             |                |                     |             |                       |
| Originality of the work                                       |                  |                  |             |                |                     |             |                       |
| Suitability and originality of the methods to be used         |                  |                  |             |                |                     |             |                       |
| Feasibility of the project                                    |                  |                  |             |                |                     |             |                       |
| Experience and past performance of the applicant              |                  |                  |             |                |                     |             |                       |
| Specific abilities of the applicants for the proposed project |                  |                  |             |                |                     |             |                       |
| Overall assessment                                            |                  |                  |             |                |                     |             |                       |

**Comments regarding the overall assessment**

---

**2. Detailed evaluation**

**Current scientific interest and impact of the project**

---

**Originality of the work**

---



1  
2  
3  
4  
5  
6  
7  
8  
9  
10  
11  
12  
13  
14  
15  
16  
17  
18  
19  
20  
21  
22  
23  
24  
25  
26  
27  
28  
29  
30  
31  
32  
33  
34  
35  
36  
37  
38  
39  
40  
41  
42  
43  
44  
45  
46

**Suitability and originality of the methods to be used**

---

**Feasibility of the project**

---

**Experience and past performance of the applicant**

---

**Specific abilities of the applicants for the proposed project**

---

**Other comments**

---

For peer review only

**NEW FORM**

**1. Synopsis**

|                                                   | <b>outstanding</b> | <b>excellent</b> | <b>very good</b> | <b>good</b> | <b>average</b> | <b>poor</b> |  | <b>Not considered</b> |
|---------------------------------------------------|--------------------|------------------|------------------|-------------|----------------|-------------|--|-----------------------|
| Applicants' scientific track record and expertise |                    |                  |                  |             |                |             |  |                       |
| Scientific relevance, originality and topicality  |                    |                  |                  |             |                |             |  |                       |
| Suitability of methods and feasibility            |                    |                  |                  |             |                |             |  |                       |
| Overall assessment                                |                    |                  |                  |             |                |             |  |                       |

**Comments regarding the overall assessment**

---

**2. Detailed evaluation**

**Applicants' scientific track record and expertise**

---

**Scientific relevance, originality and topicality**

---

**Suitability of methods and feasibility**

---

1  
2  
3  
4  
5  
6  
7  
8  
9  
10  
11  
12  
13  
14  
15  
16  
17  
18  
19  
20  
21  
22  
23  
24  
25  
26  
27  
28  
29  
30  
31  
32  
33  
34  
35  
36  
37  
38  
39  
40  
41  
42  
43  
44  
45  
46

**3. Further comments & declaration concerning conflicts of interests (will not be forwarded to applicants)**

**Confidential messages**

---

**The topic of the proposed project**

---

**Declaration concerning conflict of interests (comments, if applicable)**

---

For peer review only

STROBE Statement—Checklist of items that should be included in reports of *cross-sectional studies*

|                              | Item No | Recommendation                                                                                                                                                                                    | Page No            |
|------------------------------|---------|---------------------------------------------------------------------------------------------------------------------------------------------------------------------------------------------------|--------------------|
| <b>Title and abstract</b>    | 1       | (a) Indicate the study's design with a commonly used term in the title or the abstract                                                                                                            | 1                  |
|                              |         | (b) Provide in the abstract an informative and balanced summary of what was done and what was found                                                                                               | 2                  |
| <b>Introduction</b>          |         |                                                                                                                                                                                                   |                    |
| Background/rationale         | 2       | Explain the scientific background and rationale for the investigation being reported                                                                                                              | 4-5                |
| Objectives                   | 3       | State specific objectives, including any prespecified hypotheses                                                                                                                                  | 5                  |
| <b>Methods</b>               |         |                                                                                                                                                                                                   |                    |
| Study design                 | 4       | Present key elements of study design early in the paper                                                                                                                                           | 6                  |
| Setting                      | 5       | Describe the setting, locations, and relevant dates, including periods of recruitment, exposure, follow-up, and data collection                                                                   | 5                  |
| Participants                 | 6       | (a) Give the eligibility criteria, and the sources and methods of selection of participants                                                                                                       | n.a.               |
| Variables                    | 7       | Clearly define all outcomes, exposures, predictors, potential confounders, and effect modifiers. Give diagnostic criteria, if applicable                                                          | 6                  |
| Data sources/<br>measurement | 8*      | For each variable of interest, give sources of data and details of methods of assessment (measurement). Describe comparability of assessment methods if there is more than one group              | 6                  |
| Bias                         | 9       | Describe any efforts to address potential sources of bias                                                                                                                                         | 7                  |
| Study size                   | 10      | Explain how the study size was arrived at                                                                                                                                                         | 6                  |
| Quantitative variables       | 11      | Explain how quantitative variables were handled in the analyses. If applicable, describe which groupings were chosen and why                                                                      | 7                  |
| Statistical methods          | 12      | (a) Describe all statistical methods, including those used to control for confounding                                                                                                             | 7                  |
|                              |         | (b) Describe any methods used to examine subgroups and interactions                                                                                                                               | 7                  |
|                              |         | (c) Explain how missing data were addressed                                                                                                                                                       | 7                  |
|                              |         | (d) If applicable, describe analytical methods taking account of sampling strategy                                                                                                                | n.a.               |
|                              |         | (e) Describe any sensitivity analyses                                                                                                                                                             | n.a.               |
| <b>Results</b>               |         |                                                                                                                                                                                                   |                    |
| Participants                 | 13*     | (a) Report numbers of individuals at each stage of study—eg numbers potentially eligible, examined for eligibility, confirmed eligible, included in the study, completing follow-up, and analysed | 8                  |
|                              |         | (b) Give reasons for non-participation at each stage                                                                                                                                              | n.a.               |
|                              |         | (c) Consider use of a flow diagram                                                                                                                                                                | n.a.               |
| Descriptive data             | 14*     | (a) Give characteristics of study participants (eg demographic, clinical, social) and information on exposures and potential confounders                                                          | 8                  |
|                              |         | (b) Indicate number of participants with missing data for each variable of interest                                                                                                               | 8                  |
| Outcome data                 | 15*     | Report numbers of outcome events or summary measures                                                                                                                                              | 8,9,<br>Table<br>2 |

1  
2  
3  
4  
5  
6  
7  
8  
9  
10  
11  
12  
13  
14  
15  
16  
17  
18  
19  
20  
21  
22  
23  
24  
25  
26  
27  
28  
29  
30  
31  
32  
33  
34  
35  
36  
37  
38  
39  
40  
41  
42  
43  
44  
45  
46  
47  
48  
49  
50  
51  
52  
53  
54  
55  
56  
57  
58  
59  
60

|                          |    |                                                                                                                                                                                                              |         |
|--------------------------|----|--------------------------------------------------------------------------------------------------------------------------------------------------------------------------------------------------------------|---------|
| Main results             | 16 | (a) Give unadjusted estimates and, if applicable, confounder-adjusted estimates and their precision (eg, 95% confidence interval). Make clear which confounders were adjusted for and why they were included | Table 3 |
|                          |    | (b) Report category boundaries when continuous variables were categorized                                                                                                                                    | n.a.    |
|                          |    | (c) If relevant, consider translating estimates of relative risk into absolute risk for a meaningful time period                                                                                             | n.a.    |
| Other analyses           | 17 | Report other analyses done—eg analyses of subgroups and interactions, and sensitivity analyses                                                                                                               | 10      |
| <b>Discussion</b>        |    |                                                                                                                                                                                                              |         |
| Key results              | 18 | Summarise key results with reference to study objectives                                                                                                                                                     | 11      |
| Limitations              | 19 | Discuss limitations of the study, taking into account sources of potential bias or imprecision. Discuss both direction and magnitude of any potential bias                                                   | 13      |
| Interpretation           | 20 | Give a cautious overall interpretation of results considering objectives, limitations, multiplicity of analyses, results from similar studies, and other relevant evidence                                   | 11-14   |
| Generalisability         | 21 | Discuss the generalisability (external validity) of the study results                                                                                                                                        | 13      |
| <b>Other information</b> |    |                                                                                                                                                                                                              |         |
| Funding                  | 22 | Give the source of funding and the role of the funders for the present study and, if applicable, for the original study on which the present article is based                                                | 15      |

\*Give information separately for exposed and unexposed groups.

**Note:** An Explanation and Elaboration article discusses each checklist item and gives methodological background and published examples of transparent reporting. The STROBE checklist is best used in conjunction with this article (freely available on the Web sites of PLoS Medicine at <http://www.plosmedicine.org/>, Annals of Internal Medicine at <http://www.annals.org/>, and Epidemiology at <http://www.epidem.com/>). Information on the STROBE Initiative is available at [www.strobe-statement.org](http://www.strobe-statement.org).

# BMJ Open

## Gender and Other Potential Biases in Peer Review: Cross-sectional Analysis of 38,250 External Peer Review Reports

|                                 |                                                                                                                                                                                                                                                                                                                                       |
|---------------------------------|---------------------------------------------------------------------------------------------------------------------------------------------------------------------------------------------------------------------------------------------------------------------------------------------------------------------------------------|
| Journal:                        | <i>BMJ Open</i>                                                                                                                                                                                                                                                                                                                       |
| Manuscript ID                   | bmjopen-2019-035058.R1                                                                                                                                                                                                                                                                                                                |
| Article Type:                   | Original research                                                                                                                                                                                                                                                                                                                     |
| Date Submitted by the Author:   | 10-Mar-2020                                                                                                                                                                                                                                                                                                                           |
| Complete List of Authors:       | Severin, Anna; University of Bern, ISPM<br>Martins, Joao; European Research Council<br>Heyard, Rachel; Swiss National Science Foundation<br>Delavy, François; Swiss National Science Foundation<br>Jorstad, Anne; Swiss National Science Foundation<br>Egger, Matthias; University of Bern, Institute of Social & Preventive Medicine |
| <b>Primary Subject Heading</b>: | Epidemiology                                                                                                                                                                                                                                                                                                                          |
| Secondary Subject Heading:      | Medical publishing and peer review                                                                                                                                                                                                                                                                                                    |
| Keywords:                       | EPIDEMIOLOGY, STATISTICS & RESEARCH METHODS, Organisational development < HEALTH SERVICES ADMINISTRATION & MANAGEMENT                                                                                                                                                                                                                 |
|                                 |                                                                                                                                                                                                                                                                                                                                       |

SCHOLARONE™  
Manuscripts



I, the Submitting Author has the right to grant and does grant on behalf of all authors of the Work (as defined in the below author licence), an exclusive licence and/or a non-exclusive licence for contributions from authors who are: i) UK Crown employees; ii) where BMJ has agreed a CC-BY licence shall apply, and/or iii) in accordance with the terms applicable for US Federal Government officers or employees acting as part of their official duties; on a worldwide, perpetual, irrevocable, royalty-free basis to BMJ Publishing Group Ltd ("BMJ") its licensees and where the relevant Journal is co-owned by BMJ to the co-owners of the Journal, to publish the Work in this journal and any other BMJ products and to exploit all rights, as set out in our [licence](#).

The Submitting Author accepts and understands that any supply made under these terms is made by BMJ to the Submitting Author unless you are acting as an employee on behalf of your employer or a postgraduate student of an affiliated institution which is paying any applicable article publishing charge ("APC") for Open Access articles. Where the Submitting Author wishes to make the Work available on an Open Access basis (and intends to pay the relevant APC), the terms of reuse of such Open Access shall be governed by a Creative Commons licence – details of these licences and which [Creative Commons](#) licence will apply to this Work are set out in our licence referred to above.

Other than as permitted in any relevant BMJ Author's Self Archiving Policies, I confirm this Work has not been accepted for publication elsewhere, is not being considered for publication elsewhere and does not duplicate material already published. I confirm all authors consent to publication of this Work and authorise the granting of this licence.

1  
2  
3  
4  
5  
6  
7  
8  
9  
10  
11  
12  
13  
14  
15  
16  
17  
18  
19  
20  
21  
22  
23  
24  
25  
26  
27  
28  
29  
30  
31  
32  
33  
34  
35  
36  
37  
38  
39  
40  
41  
42  
43  
44  
45  
46  
47  
48  
49  
50  
51  
52  
53  
54  
55  
56  
57  
58  
59  
60

# Gender and Other Potential Biases in Peer Review: Cross-sectional Analysis of 38,250 External Peer Review Reports

Anna Severin<sup>1,2</sup>, João Martins<sup>1,3</sup>, Rachel Heyard<sup>1</sup>, François Delavy<sup>1</sup>,  
Anne Jorstad<sup>1</sup>, Matthias Egger<sup>1,2</sup>

<sup>1</sup>Swiss National Science Foundation, Bern, Switzerland

<sup>2</sup> Institute of Social and Preventive Medicine, University of Bern, Bern, Switzerland

<sup>3</sup> European Research Council Executive Agency, Brussels, Belgium

Corresponding Author:

Professor Matthias Egger MD MSc FFPH

Swiss National Science Foundation

Wildhainweg 3

3001 Bern, Switzerland

matthias.egger@ispm.unibe.ch

Abstract 287 words, main text 3895 words, strengths and limitations 120 words, 1 figure, 3  
tables, 31 references, supplementary materials with 1 table, 5 figures and 1 text.



## ABSTRACT

**Objectives:** To examine whether the gender of applicants and peer reviewers and other factors influence peer review of grant proposals submitted to a national funding agency.

**Setting:** Swiss National Science Foundation (SNSF).

**Design:** Cross-sectional analysis of peer review reports submitted 2009 to 2016 using linear mixed effects regression models adjusted for research topic, applicant's age, nationality, affiliation and calendar period.

**Participants:** External peer reviewers.

**Primary outcome measure:** Overall score on a scale from 1 (worst) to 6 (best).

**Results:** Analyses included 38,250 reports on 12,294 grant applications from Medicine, Architecture, Biology, Chemistry, Economics, Engineering, Geology, History, Linguistics, Mathematics, Physics, Psychology and Sociology submitted by 26,829 unique peer reviewers. In univariable analysis, male applicants received more favourable evaluation scores than female applicants (+0.18 points; 95% CI 0.14-0.23), and male reviewers awarded higher scores than female reviewers (+0.11; 95% CI 0.08-0.15). Applicant-nominated reviewers awarded higher scores than reviewers nominated by the SNSF (+0.53; 95% CI 0.50-0.56), and reviewers from outside of Switzerland more favourable scores than reviewers affiliated with Swiss institutions (+0.53; 95% CI 0.49-0.56). In multivariable analysis, differences between male and female applicants were attenuated (to +0.08; 95% CI 0.04-0.13) whereas results changed little for source of nomination and affiliation of reviewers. The gender difference increased after September 2011, when new evaluation forms were introduced (P=0.033 from test of interaction).

**Conclusions:** Peer review of grant applications at SNSF might be prone to biases stemming from different applicant and reviewer characteristics. The SNSF abandoned the nomination of peer reviewers by applicants. The new form introduced in 2011 may inadvertently have given more emphasis to the applicant's track record. We encourage other funders to conduct similar studies, in order to improve the evidence base for rational and fair research funding.

**Keywords:** peer review, bias, gender matching hypothesis, confounding, mixed effects models

## STRENGTHS AND LIMITATIONS OF THIS STUDY

- This study was based on a large sample of peer review reports on project proposals from medicine and other disciplines submitted to the national Swiss funding agency.
- It is one of a few studies examining the interaction between gender of main applicant and gender of reviewers and the 'gender matching hypothesis', as well as the influence of other characteristics of applicants.
- This study only examined scores from peer review, but not the determinants of the final funding decision or the level of funding. It is therefore unclear whether the differences in scores analysed in the present study influenced funding decisions.
- This study was carried out by researchers affiliated with the funding agency and not by an independent group of researchers.

## BACKGROUND

Expert peer review of research proposals is the accepted best practice for determining which projects are allocated funding (1). The legitimacy of funding decisions relies on a funder's ability to minimize bias in grant evaluations that results from factors that are unrelated to the quality of the applications (2). Empirical studies suggest that the evaluation of proposals is prone to biases that may relate to both applicant and reviewer characteristics (3)(4).

Potential discrimination against women is the most frequently investigated bias (5). A meta-analysis of 21 studies published 1987 to 2004 found heterogeneous results, with overall a small gender difference in grant awards, with more men receiving grants than women (6).

More recently, analyses of grant applications submitted to the Canadian Institutes of Health Research (CIHR) 2012 to 2014 showed that female applicants received lower scores (7) and had lower grant success (8). Similarly, a study of critiques of applications for renewal of National Institutes of Health (NIH) grants found that reviewers assigned significantly worse priority, approach, and significance scores to female than male principle investigators (9). Finally, the success rate of women applying for European Research Council (ERC) Starting Grants, Consolidator Grants or Advanced Grants 2007 to 2016 was consistently lower than the success rate of men (10).

Other factors than gender can influence peer review. A study of the Australian Research Council found that applicant-nominated reviewers tended to give better ratings than panel-nominated reviewers (11). Further, an analysis of data from the Austrian Science Fund suggested that international peer reviewers affiliated with research institutions located in countries known for high scientific productivity were generally more stringent than national reviewers (12).

The Swiss National Science Foundation (SNSF) supports basic research and use-inspired basic research in all disciplines. The main funding scheme of the SNSF is project funding, which provides support to independent researchers who propose research on self-chosen topics (13). The proposals submitted to the SNSF are peer reviewed by at least two external experts. The foundation allowed grant applicants to suggest reviewers to evaluate submissions via a "positive list". The names put forward on the list were then considered as potential reviewers, after a careful check for conflicts of interest (CoI). The SNSF frequently invites reviewers from abroad to review grant applications. Of note, the SNSF introduced new evaluation forms and guidelines for peer reviewers in September 2011, which we describe in the Methods section.

1  
2  
3 To gain insights into gender bias and other potential biases in peer review, we analysed the  
4 database of the SNSF to examine the determinants of overall scores from external peer  
5 reviewers in project funding.  
6  
7  
8  
9

## 10 11 **METHODS**

### 12 13 14 **Evaluation of Grant Applications at the SNSF**

15  
16 The evaluation consists of four steps (13). The administrative office first checks eligibility and  
17 assigns grant applications to two members of the National Research Council (referee and co-  
18 referee) based on their field of expertise. Second, eligible proposals are peer-reviewed by  
19 external experts. External reviewers were identified in several ways: (i) grant applicants  
20 suggested experts via the “positive list”, (ii) the referee of the National Research Council  
21 suggested reviewers, (iii) the SNSF administrative offices proposed experts, and (iv) experts  
22 who declined to review suggested other reviewers (13). For each application, at least two  
23 external reviews were required.  
24  
25  
26  
27  
28  
29  
30

31  
32 The final choice of reviewers was made by the SNSF. Reviewers from the positive list were  
33 chosen only if they had the required expertise and there were no Col. To exclude any Col,  
34 SNSF employees checked whether reviewers had submitted an application for the same call,  
35 whether they had published with the applicants in the past five years and whether they work  
36 at the same institution or in a closely associated unit. Applicants could also submit a  
37 “negative list” of reviewers who, because of a possible Col, should not be contacted.  
38  
39 Providing a positive or a negative list was optional and the lists could include one or several  
40 names.  
41  
42  
43  
44  
45  
46

47  
48 The peer review forms and assessment scale were changed in September 2011 to simplify  
49 the review, and to achieve a more equal distribution of scores, with fewer proposals in the  
50 top category. Up to September 2011, peer reviewers were asked to score six criteria: i)  
51 current scientific interest and impact of the project; ii) originality of the work; iii) suitability  
52 of the methods; iv) work plan, feasibility, cost; v) experience and past performance of the  
53 applicants; and vi) specific abilities of the investigators for the proposed project. Reviewers  
54 were asked to “give a rating and provide explanatory comments” for each of the six criteria.  
55  
56 In September 2011, new evaluation forms were introduced (13)(14), which asked experts to  
57  
58  
59  
60

1  
2  
3 review proposals according to three criteria: i) the applicants' scientific track-record and  
4 expertise; ii) the scientific relevance, originality and topicality of the proposed research and,  
5 in the case of use-inspired research, the research's broader impact; and iii) the suitability of  
6 the methods and feasibility. Furthermore, peer reviewers were asked to declare any CoI, and  
7 given the opportunity to submit confidential comments, which would not be seen by the  
8 applicants. Up to September 2011, reviewers scored the overall proposal and each criterion  
9 on a scale from 1 to 6: poor (score 1), satisfactory, average, good, very good, and excellent  
10 (score 6). In September 2011 the scale was changed to poor (score 1), average, good, very  
11 good, excellent, and outstanding (score 6). The two versions of the peer review form are  
12 reproduced in supplementary [Text S1](#). The overall score was attributed by the external  
13 reviewers and there were no guidelines on how they should weight the criteria. Applications  
14 were not blinded and reviewers were therefore aware of applicant's gender and their track  
15 records.

16  
17 In the third step of the evaluation, the two members of the Council (referee and co-referee)  
18 assessed the peer review reports and considered them when ranking the application relative  
19 to other proposals. In the fourth and final step, referee and co-referee presented their  
20 assessment at the meeting of the corresponding section of Council. Each application was  
21 then voted on and approved or rejected (13).

### 22 **Data and Variables**

23  
24 We analysed the overall scores of external peer review reports submitted from 2009 to  
25 2016. The outcome variable of interest was the overall score of a grant application given by  
26 external reviewers. Explanatory variables included meta-data on principle applicants and  
27 external peer reviewers, including source of reviewer (applicant-nominated vs. SNSF-  
28 nominated), gender of the applicant and gender of the reviewer (female vs. male) and  
29 country of affiliation of the reviewer (Switzerland vs. other). The mean ratio of female to  
30 male reviewers per grant application was 0.2. Eighteen percent of the grant applications had  
31 male-only external reviewers while only 1% had female-only external reviewers. SNSF-  
32 nominated experts included reviewers who were proposed by the referee, the SNSF office or  
33 by experts who declined to review. We also considered the research topic of a grant  
34 application as defined by the applicant when submitting their application (see [Table S1](#) in the  
35 Supplement), type of institutional affiliation (which included Swiss Federal Institutes of  
36  
37  
38  
39  
40  
41  
42  
43  
44  
45  
46  
47  
48  
49  
50  
51  
52  
53  
54  
55  
56  
57  
58  
59  
60

1  
2  
3 Technology and associated institutions, i.e. the ETH domain; Cantonal university; and other)  
4 and age of the applicant. Finally, we introduced a dummy variable to group applications  
5 submitted before and after September 2011.  
6  
7

### 8 9 **Statistical Analysis**

10  
11  
12 We used a linear mixed effects model to examine the effect of explanatory variables on the  
13 overall peer-review scores (15). This model was chosen because the data are clustered and  
14 hierarchical (16). Grant applications received two or more independent reviews, some  
15 reviewers had reviewed more than one application and many applicants had submitted  
16 more than one grant application over the study period, causing evaluation scores to be  
17 clustered at the levels of research projects, reviewers and applicants. We therefore  
18 introduced random intercepts for the identifiers of the reviewer, the applicant and the  
19 project in the model, thus taking into account the dependence between clustered scores  
20 (17). Given that  $y_{ijk}$  is the overall score given by reviewer  $i$  to application  $j$  submitted by  
21 applicant  $k$ , the final model is the following:  
22  
23  
24  
25  
26  
27  
28  
29

$$30 \quad y_{ijk} = X_{ijk} \beta + u_i + v_j + w_k + \epsilon$$

31  
32 where  $X_{ijk}$  is the matrix with the explanatory variables,  $\beta$  is the regression coefficient  
33 vector, and  $u_i$ ,  $v_j$ ,  $w_k$  are the respective vectors of random intercepts and  $\epsilon$  is the vector  
34 of random errors.  
35  
36  
37  
38

39 We ran crude and adjusted models. The latter were adjusted for gender of the applicant and  
40 reviewer, source of reviewers, country of affiliation of the reviewer, the applicant's age (per  
41 10 year increase), affiliation, and nationality (Swiss vs. other), the field of research (12  
42 categories), and the period of submission of the proposal (before or after the change in peer  
43 review forms and scale). To make adjusted and crude estimates comparable, we performed  
44 a complete case analysis by deleting peer review reports with missing values for any of the  
45 relevant variables. We examined interactions between the gender of the applicant and the  
46 gender of the reviewer, and other variables, by including interaction terms in the linear  
47 mixed models. We thus examined the 'gender matching hypothesis', which stipulates that  
48 female peer reviewers give higher scores to female researchers and that male reviewers do  
49 the same for male applicants (18). We used likelihood ratio tests to assess the strength of the  
50 evidence for interactions.  
51  
52  
53  
54  
55  
56  
57  
58  
59  
60

1  
2  
3 We present crude and adjusted regression coefficients, which reflect differences in peer  
4 review scores with their 95% confidence interval (CI). The notebook of the analysis, including  
5 summaries of the different statistical models, is available online at [www.git.io/fhaJx](http://www.git.io/fhaJx).  
6  
7  
8

### 9 **Patient and Public Involvement**

10  
11 This analysis was based on peer review reports submitted to a national research funder. No  
12 patients were involved in developing the research question, outcome measures and overall  
13 design of the study. Due to the anonymous nature of the data, we were unable to  
14 disseminate the results of the research directly to study participants.  
15  
16  
17  
18  
19  
20  
21

## 22 **RESULTS**

23  
24 We analysed the summary scores of 38,250 external peer review reports on 12,294 project  
25 grant applications across all disciplines that were submitted from 2009 to 2016 by 26,829  
26 unique reviewers from Switzerland and abroad. The average number of reviews per grant  
27 application was 3.1, applicants submitted an average of 2.1 grant applications and reviewers  
28 reviewed an average of 1.4 applications. The complete case mixed effects regression  
29 analyses were based on 37,989 reviews (99.3%).  
30  
31  
32  
33  
34  
35

### 36 **Applicant characteristics**

37  
38 The 12,294 proposals were submitted by 5,820 applicants: 4,514 (77.6%) men and 1,306  
39 (22.4%) women ([Table 1](#)). Most applicants were based at Cantonal universities, were Swiss,  
40 and the largest number was from medicine. Female applicants were younger than men and  
41 more likely to be affiliated with other institutions (for example universities of applied  
42 sciences, the arts or teacher education) than with the Federal ETH domain or the Cantonal  
43 universities. Women were also more likely to work in medicine, the social sciences and  
44 humanities (psychology, sociology, linguistics) than in STEM disciplines (Science, Technology,  
45 Engineering, and Mathematics) or biology ([Table 1](#)).  
46  
47  
48  
49  
50  
51  
52  
53

### 54 **Peer review scores across groups of applicants and reviewers**

55  
56 Distributions of overall peer review scores were somewhat skewed, with applications more  
57 frequently being awarded high evaluation scores than low scores (see notebook at  
58 [www.git.io/fhaJx](http://www.git.io/fhaJx)). Male principle applicants received higher evaluation scores than female  
59  
60

1  
2  
3 principle applicants ([Table 2](#)). Similarly, the analysis of evaluation scores by gender of the  
4 reviewer showed that male reviewers tended to award higher scores than female reviewers.  
5 Applicant-nominated reviewers awarded higher scores than SNSF-nominated reviewers, and  
6 reviewers affiliated with institutions outside Switzerland awarded higher evaluation scores  
7 than reviewers affiliated with Swiss institutions.  
8  
9

10  
11  
12  
13 There were important differences in evaluation scores across research fields. Grant  
14 applications in the natural and technical sciences or in linguistics and history received higher  
15 evaluation scores than applications from medicine, sociology or psychology ([supplementary](#)  
16 [Figure S1](#)). Gender differences in scores were more pronounced for some research topics  
17 (for example mathematics and physics and engineering, biology and medicine, sociology)  
18 than others (for example geology, history, psychology). Female applicants were  
19 underrepresented (below 50 percent) in all research topics (lower panel of [supplementary](#)  
20 [Figure S1](#)).  
21  
22

23  
24 Applicants aged 60 years or older received the highest evaluation scores, independent of  
25 their gender. For the younger age groups, female applicants consistently received lower  
26 evaluation scores than male applicants ([supplementary Figure S2](#)). Female applicants were  
27 under represented across all age groups, except for the youngest age group, and  
28 representation was particularly low in older age groups (lower panel of [supplementary](#)  
29 [Figure S2](#)). Applications submitted by applicants affiliated with the ETH Domain received  
30 higher evaluation scores than applications from Cantonal universities or from other research  
31 institutions. Gender differences in scores were evident for all three affiliations, and women  
32 were under represented for all affiliations ([supplementary Figure S3](#)).  
33  
34

35  
36 Grant applications submitted by Swiss applicants received slightly lower scores than those  
37 submitted by applicants with other nationalities, with a similar gap between genders  
38 ([supplementary Figure S4](#)). Finally, [supplementary Figure S5](#) shows that, as expected,  
39 applications submitted before the new forms were introduced received higher scores than  
40 applications evaluated later.  
41  
42

### 43 **Linear Mixed-Effects Models**

44  
45 [Table 3](#) shows crude and adjusted differences in peer review scores by characteristics of  
46 applicants, reviewers and research proposals. In the crude model, the difference between  
47 male and female applicants was 0.18 points favouring men. More substantial differences of  
48  
49  
50  
51  
52  
53  
54



1  
2  
3 0.53 points were observed for source of reviewer (0.53 points higher if the reviewer was  
4 nominated by the applicants) and country of affiliation of the reviewer (0.53 higher for  
5 reviewers from outside Switzerland). Substantial differences were also observed across  
6 disciplines. For example, scores were on average 0.68 points higher in mathematics and  
7 physics than in medicine, but 0.12 point lower in psychology than in medicine ([Table 3](#)).  
8 Compared to crude differences, most adjusted differences were smaller. For example, the  
9 adjusted difference between male and female applicants was reduced from 0.18 to 0.08  
10 points. One exception was the difference observed between proposals evaluated before or  
11 after the introduction of the new peer review forms in September 2011 (0.43 points higher  
12 scores before the introduction in both analyses).

### 21 22 **Interactions between gender of the applicants and other variables**

23  
24 We examined possible interactions between the genders of the applicants with the other  
25 fixed-effect variables in the model shown in [Table 2](#). In other words, we examined whether  
26 the differences observed between female and male applicants varied across the levels of the  
27 other variables. We found that male reviewers gave higher scores both to male and female  
28 applicants than female reviewers, but this difference was considerably greater for male than  
29 for female applicants. [Figure 1](#) shows the predicted values of the overall score from the  
30 bivariable model ( $P=0.011$  from test of interaction). There was some evidence that the  
31 gender difference in scores became larger after the introduction of the new evaluation form  
32 ( $P=0.065$ , [Figure 1](#)). There was also strong evidence for an interaction ( $P<0.0001$ ) between  
33 gender of the first applicant and his or her affiliation: the gender differences in scores were  
34 smallest for applicants based at one of the Cantonal universities, larger for the ETH domain  
35 and most pronounced for other institutions of higher education (for example universities of  
36 applied sciences, the arts or teacher education, see [Figure 1](#)). The interaction P values from  
37 the adjusted models were 0.037 (gender of peer reviewer), 0.003 (affiliation of applicant)  
38 and 0.033 (change of evaluation form). All P values from the bivariable and multivariable  
39 interaction tests are shown in supplementary [Table S2](#). Interaction effects were small. The  
40 effect sizes can be found in the online notebook at [www.git.io/fhaJx](http://www.git.io/fhaJx).

## DISCUSSION

This study of 38,250 distinct grant reviews of 12,294 proposals across all disciplines, which were submitted to the SNSF between 2009 and 2016 by 5,832 applicants is to the best of our knowledge one of the largest studies of peer review reports on research proposals ever conducted. Female applicants received lower scores than male applicants. The gender difference was attenuated in multivariable analysis: it was partly explained by the fact that women were under represented among applicants in the fields and institutions whose proposals were rated highly, for example mathematics and physics, and institutions of the ETH domain. Our finding is in line with a text analysis of critiques of funded and unfunded National Institutes of Health (NIH) grant applications, which found that reviewers assigned significantly worse scores for research approach, significance and priority to female than male applicants. The authors concluded that reviewers implicitly hold male and female applicants to different standards of evaluation (19)

Although a substantial proportion of the gender gap in our study was explained by other factors, these factors might be a reflection of the leaky pipeline, i.e. “the phenomenon of women dropping out of research and academic careers at a faster rate than men” (20), which is well documented for Switzerland (21,22). The academic pipeline in Switzerland is particularly leaky in the life sciences, social sciences and humanities. In STEM the rate of dropout of women is less pronounced, but they are a minority from the start: among PhD students only about 20% are women, whereas in the social sciences, humanities, and the life sciences the majority of doctoral students are women (22).

A noteworthy finding of our study was the interaction between the gender of applicants and peer reviewers. In contrast to Jayasinghe and colleagues (18), who analysed 7,153 reviewer ratings at the Australian Research Council large grant programme and other smaller studies (2)(23), we found evidence supporting the ‘gender matching hypothesis’. Male reviewers gave systematically higher ratings to male applicants than to female applicants, whereas the same phenomenon could not be observed for female reviewers. If such matching bias was present, male reviewers will have favoured male applicants, despite the fact that the proposals from male and female applicants were of similar quality. Alternatively, assuming proposals from male applicants were in fact stronger, female reviewers could have been biased against men and could have downgraded their proposals.

1  
2  
3 Male reviewers may have given more weight to the track record of applicants than female  
4 reviewers. In this context, it is interesting that the gender gap became wider after  
5 September 2011, when new evaluation forms for external peer review were introduced. The  
6 new guidelines and form separated the criteria related to the applicants, and the criteria  
7 related to the proposed project. On the new form, the applicant's track record was the first  
8 criterion out of a total of three, whereas it was the fifth out of six criteria on the old form.  
9 Although this was not intended, the reform may have led to reviewers giving more weight to  
10 the track record of applicants, due to its prominence on the new form. Commenting on a  
11 Canadian study, which showed that the gender gap in grant funding was due to less positive  
12 assessments of women as principal investigators whereas the quality of the proposed  
13 research was similar for women and men (24), Raymond and Goodman asked funders to  
14 "evaluate projects, not people" (25). We are planning additional analyses to examine  
15 whether at the SNSF the same phenomenon is at play, i.e. whether the gender gap is driven  
16 by the assessments of the track record. Furthermore, the SNSF is discussing changes to the  
17 peer review form.

18  
19  
20  
21  
22  
23  
24  
25  
26  
27  
28  
29  
30  
31 Our results confirm those from the Australian Research Council, which showed that  
32 applicant-nominated reviewers gave higher ratings than panel-nominated reviewers (11). A  
33 study of peer review in biomedical journals also found that author-nominated reviewers  
34 submitted more favourable recommendations than editor-nominated reviewers (26). This  
35 difference may be interpreted in several ways. First, nominated reviewers may have a Col  
36 that remained undetected in the SNSF Col examination. Alternatively, applicants may  
37 nominate reviewers who are more familiar with their field than reviewers nominated by the  
38 SNSF, and thus more able to recognize the impact and importance of the proposed research.  
39 Like the Australian Research Council, the SNSF felt that bias was the more likely explanation  
40 and decided to discontinue the use of the "positive list" in 2016. Of note, applicants can still  
41 submit a "negative list" of reviewers that should not be used because of perceived Col.

42  
43  
44  
45  
46  
47  
48  
49  
50  
51  
52 The gender effect was larger for proposals affiliated with an institution from the Federal ETH  
53 domaine, and especially, from other institutions (for example universities of applied  
54 sciences, the arts or teacher education) compared to applicants affiliated to Cantonal  
55 universities. In this context, male applicants from other Institutions got systematically higher  
56 ratings than their female peers, while the observed gender differences in scores for  
57 applicants from Cantonal universities was less pronounced, especially after adjustment for  
58  
59  
60

1  
2  
3 confounding variables. The underrepresentation of female researchers in the ETH domain  
4 and in other institutions might have contributed to this situation, by making the few women  
5 applicants appear less qualified to the male reviewers.  
6  
7

8  
9 Peer reviewers affiliated with a Swiss research institution gave lower scores than reviewers  
10 from outside Switzerland. A study of the Austrian Science Fund suggested that reviewers  
11 from countries with high scientific productivity were more stringent than national reviewers  
12 (12). Switzerland belongs to the most productive countries in terms of research output (27)  
13 and this might explain why reviewers affiliated with Swiss research institutions award lower  
14 evaluation scores than reviewers from abroad. In contrast to the Austrian study (12), the  
15 Australian data showed that reviewers affiliated with an institution in the United States of  
16 America (USA) were more lenient than reviewers affiliated with institutions located in the  
17 United Kingdom, Germany or Australia (28), despite the fact that the USA is the country with  
18 the highest research output globally (27). Other explanations for the lower scores awarded  
19 by Swiss reviewers include greater knowledge of the local research capacity and expertise, or  
20 bias, if reviewers based in Switzerland downgraded the proposals of their competitors.  
21  
22

23  
24 Our study has several limitations. First, we did not examine the determinants of the final  
25 funding decision or the level of funding. It is therefore unclear whether the differences in  
26 scores analysed in the present study influenced funding decisions. Such analyses are planned  
27 for the future. Second, this is an observational study and it is therefore difficult to infer  
28 causality from the associations observed. Chance, bias, and confounding variables must be  
29 considered as possible explanations for associations between reviewer and applicant  
30 characteristics and overall scores (29). We tried to control for confounding by adjusting for  
31 these variables in regression models. We are considering randomized experiments to test  
32 certain interventions (e.g., blinding) in order to prevent or reduce gender effects for the  
33 future. Third, our results are relevant to the Swiss context, but may not be applicable to  
34 other countries. Fourth, we did not attempt to rate the expertise of the reviewers, and adjust  
35 for the differences in individual reviewers scores based on their previous performance. We also  
36 did not measure the scientific productivity of applicants, and adjust scores for productivity.  
37 Other studies have shown that women have lower productivity than men (7,30). Fifth, this study  
38 was carried out by researchers affiliated with the SNSF and not by an independent research  
39 institution. As studies might be influenced by the expectations of the researchers of the study,  
40 the credibility of the results might be reduced. We address this by making the data available for  
41  
42  
43  
44  
45  
46  
47  
48  
49  
50  
51  
52  
53  
54  
55  
56  
57  
58  
59  
60

1  
2  
3 replication. Finally, we examined project funding only, but not career funding or programme  
4 funding.  
5  
6  
7

## 8 9 **CONCLUSIONS**

10  
11 In conclusion, our results had important implications for the evaluation of project grant  
12 proposals at the SNSF. The foundation abandoned the nomination of peer reviewers by  
13 applicants, and made members of evaluation panels aware of the other factors, including  
14 the gender and affiliation of reviewers, that can influence review scores. We encourage all  
15 funding bodies to contribute to research on potential biases in research funding, and ways of  
16 preventing them (31).  
17  
18  
19  
20  
21  
22  
23  
24  
25  
26  
27  
28  
29  
30  
31  
32  
33  
34  
35  
36  
37  
38  
39  
40  
41  
42  
43  
44  
45  
46  
47  
48  
49  
50  
51  
52  
53  
54  
55  
56  
57  
58  
59  
60

## FOOTNOTES

**Acknowledgements:** Earlier results from this analysis were presented at the 5th International Congress on Peer Review and Scientific Publication, Chicago, Illinois, USA; September 10-12, 2017. We are grateful to Angelika Kalt, Benjamin Rindlisbacher, Barbara Curdy-Korrodi and two expert reviewers for helpful comments on previous versions of this paper, and to Andreas Limacher and Lukas Bütikofer (Clinical Trials Unit of the Faculty of Medicine of the University of Bern) for advice on the statistical analyses.

**Contributors:** AS, JM and ME conceived the study. JM and RH performed statistical analyses. FD and AJ contributed to data management and statistical analyses. AS and JM wrote the first draft of the paper, which was revised by ME, AS and RH. All authors contributed to and approved the final version.

**Funding:** This work was supported by the SNSF (internal funds and grant number 174281).

**Competing interests:** The authors are employees of the SNSF; they declare that they have no other competing interests.

**Patient consent:** Not applicable.

**Ethics approval:** Under Swiss law, not ethics approval is required for this type of study. Peer reviewers did not provide consent. No peer reviewer, applicant or proposal can be identified from this report.

**Data sharing statement:** The data analysed in this study are available to others on request for an approved research project, after signing a data sharing agreement.

## References

1. Harman G. The Management of Quality Assurance: A Review of International Practice. *Higher Education Quarterly* 52(4):345 - 364. 2002;52(4):345–64.
2. Bornmann L, Daniel H-D. Gatekeepers of science—Effects of external reviewers' attributes on the assessments of fellowship applications. *Journal of Informetrics*. 2007 Jan;1(1):83–91.
3. Bornmann L, Daniel H-D. Gatekeepers of science - Effects of external reviewers' attributes on the assessments of fellowship applications. *J Informetr*. 2007 Jan;1(1):83–91.
4. Demicheli V, C DP. Peer review for improving the quality of grant applications ( Review ). 2008;(2).
5. Mutz R, Bornmann L, Daniel H-D. Does Gender Matter in Grant Peer Review? An Empirical Investigation Using the Example of the Austrian Science Fund. *Z Psychol-J Psychol*. 2012;220(2):121–9.
6. Bornmann L, Mutz R, Daniel H. Gender differences in grant peer review: A meta-analysis. *Journal of Informetrics*. 2007 Jul;1(3):226–238.
7. Tamblyn R, Girard N, Qian CJ, Hanley J. Assessment of potential bias in research grant peer review in Canada. *Can Med Assoc J*. 2018 Apr 23;190(16):E489–99.
8. Burns KEA, Straus SE, Liu K, Rizvi L, Guyatt G. Gender differences in grant and personnel award funding rates at the Canadian Institutes of Health Research based on research content area: A retrospective analysis. *PLoS Med*. 2019;16(10):e1002935.
9. Kaatz A, Lee Y-G, Potvien A, Magua W, Filut A, Bhattacharya A, et al. Analysis of National Institutes of Health R01 Application Critiques, Impact, and Criteria Scores: Does the Sex of the Principal Investigator Make a Difference? *Acad Med*. 2016;91(8):1080–8.
10. Bautista-Puig N, Garcia-Zorita C, Mauleon E. European Research Council: excellence and leadership over time from a gender perspective. *Res Evaluat*. 2019 Oct;28(4):370–82.
11. Marsh HW, Bonds NW, Jayasinghe UW. Peer review process: Assessments by applicant-nominated referees are biased, inflated, unreliable and invalid. *Aust Psychol*. 2007 Mar;42(1):33–8.
12. Fischer C, Reckling FJ. Factors Influencing Approval Probability in Austrian Science Fund (FWF) Decision-Making Procedures - FWF Stand-Alone Projects Programme, 1999 to 2008 [Internet]. Rochester, NY: Social Science Research Network; 2010 Dec [cited 2019 May 5]. Report No.: ID 1725985. Available from: <https://papers.ssrn.com/abstract=1725985>
13. Swiss National Science Foundation. Funding Regulations. Regulations of the Swiss National Science Foundation on research grants. Version 1.1.2016 [Internet]. 2016. Available from: [http://www.snf.ch/SiteCollectionDocuments/allg\\_reglement\\_16\\_e.pdf](http://www.snf.ch/SiteCollectionDocuments/allg_reglement_16_e.pdf)

14. Project funding - SNF [Internet]. [cited 2019 May 25]. Available from: <http://www.snf.ch/en/theSNSF/evaluation-procedures/project-funding/Pages/default.aspx>
15. Bates D, Maechler M, Bolker BM, Walker SC. Fitting Linear Mixed-Effects Models Using lme4. *J Stat Softw*. 2015 Oct;67(1):1–48.
16. Jayasinghe UW, Marsh HW, Bond N. A multilevel cross-classified modelling approach to peer review of grant proposals: the effects of assessor and researcher attributes on assessor ratings. *Journal of the Royal Statistical Society: Series A (Statistics in Society)*. 2003 Oktober;166(3):279–300.
17. Harrison XA, Donaldson L, Correa-Cano ME, Evans J, Fisher DN, Goodwin CED, et al. A brief introduction to mixed effects modelling and multi-model inference in ecology. *PeerJ*. 2018;6:e4794.
18. Jayasinghe UW, Marsh HW, Bond N. A multilevel cross-classified modelling approach to peer review of grant proposals: the effects of assessor and researcher attributes on assessor ratings. *J Royal Statistical Soc A*. 2003 Oct;166(3):279–300.
19. Kaatz A, Lee Y-G, Potvien A, Magua W, Filut A, Bhattacharya A, et al. Analysis of National Institutes of Health R01 Application Critiques, Impact, and Criteria Scores: Does the Sex of the Principal Investigator Make a Difference? *Academic Medicine*. 2016 Aug;91(8):1080–8.
20. Directorate-General for Research and Innovation. She Figures 2015 [Internet]. 2015. 224 p. Available from: [https://ec.europa.eu/research/swafs/index.cfm?pg=library&lib=gender\\_equality](https://ec.europa.eu/research/swafs/index.cfm?pg=library&lib=gender_equality)
21. Bataille P, Le Feuvre N, Morales SK. Should I stay or should I go? The effects of precariousness on the gendered career aspirations of postdocs in Switzerland. *Eur Educ Res J*. 2017 May;16(2–3):313–31.
22. Schubert F, Engelage S. Wie undicht ist die Pipeline? Wissenschaftskarrieren von promovierten Frauen. *Köln Z Soziol*. 2011 Sep;63(3):431–57.
23. Sonnert G. What Makes a Good Scientist?: Determinants of Peer Evaluation among Biologists. *Social Studies of Science*. 1995;25(1):35–55.
24. Witteman HO, Hendricks M, Straus S, Tannenbaum C. Are gender gaps due to evaluations of the applicant or the science? A natural experiment at a national funding agency. *The Lancet*. 2019 Feb;393(10171):531–40.
25. Raymond JL, Goodman MB. Funders should evaluate projects, not people. *The Lancet*. 2019 Feb;393(10171):494–5.
26. Schroter S, Tite L, Hutchings A, Black N. Differences in review quality and recommendations for publication between peer reviewers suggested by authors or by editors. *JAMA-J Am Med Assoc*. 2006 Jan 18;295(3):314–7.
27. Country outputs | Nature Index [Internet]. [cited 2019 May 14]. Available from: <https://www.natureindex.com/country-outputs>



- 1
- 2
- 3 28. Wood F. The peer review process [Internet]. Canberra: Australian Govt. Pub. Service;
- 4 1997 [cited 2019 May 5] p. 189. Available from:
- 5 <https://trove.nla.gov.au/version/45600880>
- 6
- 7 29. Smith GD, Ebrahim S. Data dredging, bias, or confounding - They can all get you into
- 8 the BMJ and the Friday papers. *Br Med J*. 2002 Dec 21;325(7378):1437-+.
- 9
- 10 30. Wennerås C, Wold A. Nepotism and sexism in peer-review. *Nature*. 1997
- 11 May;387(6631):341-3.
- 12
- 13 31. Tricco AC, Thomas SM, Antony J, Rios P, Robson R, Pattani R, et al. Strategies to
- 14 Prevent or Reduce Gender Bias in Peer Review of Research Grants: A Rapid Scoping
- 15 Review. *PLoS One*. 2017 Jan 6;12(1):e0169718.
- 16
- 17
- 18
- 19
- 20
- 21
- 22
- 23
- 24
- 25
- 26
- 27
- 28
- 29
- 30
- 31
- 32
- 33
- 34
- 35
- 36
- 37
- 38
- 39
- 40
- 41
- 42
- 43
- 44
- 45
- 46
- 47
- 48
- 49
- 50
- 51
- 52
- 53
- 54
- 55
- 56
- 57
- 58
- 59
- 60

### Legend to Figure

#### **Figure 1: Gender differences in external evaluation scores by gender of the expert reviewer, affiliation and period of submission of the proposal.**

Predicted values from bivariable, unadjusted models (upper panel) and the multivariable analysis (lower panel) are shown, together with their 95% confidence intervals. Scores range from 1 (worst) to 6 (best). Average (mean) overall scores are shown, horizontal lines indicate Wald 95% confidence intervals.

For peer review only

**Table 1. Characteristics of applicants who submitted grant applications to the Swiss National Science Foundation between 2009 and 2016, stratified by gender.**

|                          | Male applicants<br>(n = 4,514, 78%) | Female applicants<br>(n = 1,306, 22%) |
|--------------------------|-------------------------------------|---------------------------------------|
| Age (mean, SD)           | 48.24 (8.63)                        | 46.23 (8.27)                          |
| <b>Affiliation</b>       |                                     |                                       |
| ETH Domain               | 1,195 (26%)                         | 219 (17%)                             |
| Other                    | 481 (11%)                           | 224 (17%)                             |
| Universities (reference) | 2,838 (63%)                         | 863 (66%)                             |
| <b>Nationality</b>       |                                     |                                       |
| Other than Swiss         | 1,896 (42%)                         | 573 (44%)                             |
| Swiss                    | 2,618 (58%)                         | 733 (56%)                             |
| <b>Field of research</b> |                                     |                                       |
| Medicine (reference)     | 1,029 (23%)                         | 317 (24%)                             |
| Architecture             | 146 (3%)                            | 56 (4%)                               |
| Biology                  | 611 (14%)                           | 129 (10%)                             |
| Chemistry                | 378 (8%)                            | 76 (6%)                               |
| Economics                | 290 (6%)                            | 84 (6%)                               |
| Engineering              | 527 (12%)                           | 74 (6%)                               |
| Geology                  | 144 (3%)                            | 24 (2%)                               |
| History                  | 209 (5%)                            | 68 (5%)                               |
| Linguistics              | 203 (5%)                            | 102 (8%)                              |
| Mathematics / Physics    | 491 (11%)                           | 56 (4%)                               |
| Psychology               | 223 (5%)                            | 164 (13%)                             |
| Sociology                | 263 (6%)                            | 156 (12%)                             |

The characteristics refer to the first submission of a project grant proposal during the study period. Numbers (%) are shown unless otherwise indicated. Analysis based on 5,820 unique applicants without missing values.

**Table 2: Mean of overall score by groups of applicants and peer reviewers.**

| Group                         | No. of peer review reports | Mean overall score (SD) |
|-------------------------------|----------------------------|-------------------------|
| Female Applicants             | 7,764                      | 4.42 (1.25)             |
| Male Applicants               | 30,455                     | 4.63 (1.22)             |
| Female Reviewers              | 7,591                      | 4.44 (1.26)             |
| Male Reviewers                | 30,659                     | 4.63 (1.22)             |
| Applicant-nominated Reviewers | 8,755                      | 5.12 (1.00)             |
| SNSF-nominated Reviewers      | 29,495                     | 4.43 (1.25)             |
| International-based Reviewers | 29,423                     | 4.71 (1.19)             |
| National-based Reviewers      | 8,604                      | 4.16 (1.28)             |

SD, standard deviation.

Results based on 38,250 peer review reports.

**Table 3: Crude and adjusted differences in external peer review evaluation scores by characteristics of applicants, reviewers and research proposals.**

| Variable                            | Number of reviews analysed | Unadjusted difference (95% CI) | P      | Adjusted difference (95% CI) | P      |
|-------------------------------------|----------------------------|--------------------------------|--------|------------------------------|--------|
| Gender of the applicant             |                            |                                | <0.001 |                              | <0.001 |
| Male                                | 30,263                     | 0.18 (0.14 – 0.23)             |        | 0.08 (0.04 – 0.13)           |        |
| Female                              | 7,716                      | 0                              |        | 0                            |        |
| Gender of the reviewer              |                            |                                | <0.001 |                              | <0.001 |
| Male                                | 30,442                     | 0.11 (0.08 – 0.15)             |        | 0.08 (0.05 – 0.11)           |        |
| Female                              | 7,537                      | 0                              |        | 0                            |        |
| Source of nomination of reviewer    |                            |                                | <0.001 |                              | <0.001 |
| Applicant                           | 8,688                      | 0.53 (0.50 – 0.56)             |        | 0.49 (0.46 – 0.51)           |        |
| Office                              | 29,291                     | 0                              |        | 0                            |        |
| Country of affiliation of reviewer  |                            |                                | <0.001 |                              | <0.001 |
| Outside Switzerland                 | 29,384                     | 0.53 (0.49 – 0.56)             |        | 0.47 (0.44 – 0.50)           |        |
| Switzerland                         | 8,595                      | 0                              |        | 0                            |        |
| Age of the applicant                | 37,989                     |                                | <0.001 |                              | <0.001 |
| Per 10 year increase                |                            | 0.06 (0.03 – 0.08)             |        | 0.05 (0.03 – 0.07)           |        |
| Affiliation of the applicant        |                            |                                | <0.001 |                              | <0.001 |
| ETH Domain                          | 9,960                      | 0.30 (0.26 – 0.34)             |        | 0.11 (0.07 – 0.16)           |        |
| Other                               | 4,075                      | -0.24 (-0.30 – -0.19)          |        | -0.19 (-0.25 – -0.14)        |        |
| Universities                        | 23,944                     | 0                              |        | 0                            |        |
| Nationality of the applicant        |                            |                                | 0.155  |                              | 0.143  |
| Other than Swiss                    | 16,545                     | 0.03 (-0.01 – 0.06)            |        | -0.03 (-0.06 – 0.01)         |        |
| Swiss                               | 21,434                     | 0                              |        | 0                            |        |
| Field of research                   |                            |                                | <0.001 |                              | <0.001 |
| Medicine                            | 7,540                      | 0                              |        | 0                            |        |
| Architecture                        | 1,391                      | 0.13 (0.03 – 0.24)             |        | 0.15 (0.05 – 0.25)           |        |
| Biology                             | 3,872                      | 0.30 (0.24 – 0.36)             |        | 0.27 (0.21 – 0.33)           |        |
| Chemistry                           | 3,244                      | 0.46 (0.39 – 0.53)             |        | 0.24 (0.17 – 0.31)           |        |
| Economics                           | 2,171                      | -0.09 (-0.17 – -0.01)          |        | -0.01 (-0.09 – 0.06)         |        |
| Engineering                         | 4,880                      | 0.32 (0.25 – 0.38)             |        | 0.07 (0.00 – 0.13)           |        |
| Geology                             | 1,167                      | 0.50 (0.39 – 0.60)             |        | 0.25 (0.14 – 0.35)           |        |
| History                             | 2,053                      | 0.35 (0.27 – 0.44)             |        | 0.32 (0.24 – 0.40)           |        |
| Linguistics                         | 2,244                      | 0.30 (0.22 – 0.38)             |        | 0.26 (0.18 – 0.34)           |        |
| Mathematics / Physics               | 3,979                      | 0.68 (0.62 – 0.75)             |        | 0.45 (0.39 – 0.52)           |        |
| Psychology                          | 2,458                      | -0.12 (-0.20 – -0.05)          |        | -0.08 (-0.15 – 0.00)         |        |
| Sociology                           | 2,980                      | -0.06 (-0.13 – 0.02)           |        | 0.01(-0.06 – 0.08)           |        |
| Introduction of reviewer guidelines |                            |                                | <0.001 |                              | <0.001 |
| Before introduction                 | 11,151                     | 0.44 (0.41 – 0.47)             |        | 0.43 (0.40 – 0.46)           |        |
| After introduction                  | 26,828                     | 0                              |        | 0                            |        |

95% CI, 95% confidence interval. Results from linear mixed effects models based on 37,979 complete peer review reports.

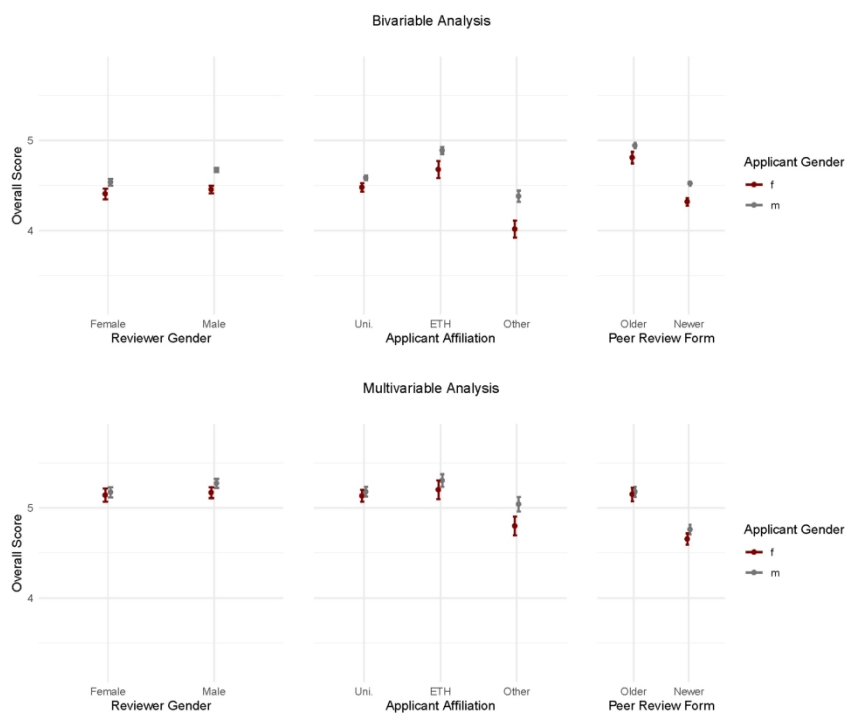

Gender differences in external evaluation scores by gender of the expert reviewer, affiliation and period of submission of the proposal. Predicted values from bivariable, unadjusted models (upper panel) and the multivariable analysis (lower panel) are shown, together with their 95% confidence intervals. Scores range from 1 (worst) to 6 (best). Average (mean) overall scores are shown, horizontal lines indicate Wald 95% confidence intervals.

254x190mm (300 x 300 DPI)

## Supplementary materials

**Table S1: P values from interaction tests of gender of the applicant with other variables, based on bivariable and multivariable models.**

|                                    | Bivariable | Multivariable* |
|------------------------------------|------------|----------------|
| Gender of reviewer                 | 0.011      | 0.037          |
| Source of nomination of reviewer   | 0.71       | 0.17           |
| Country of affiliation of reviewer | 0.57       | 0.27           |
| Age of applicant                   | 0.74       | 0.67           |
| Affiliation of the applicant       | <0.001     | 0.003          |
| Nationality of the applicant       | 0.51       | 0.92           |
| Research topic                     | 0.36       | 0.31           |
| Change of guidelines               | 0.065      | 0.033          |

\*Adjusted for all variables listed in Table 2 of the main paper.

**Table S2: Definition of the field of research.**

The field of research is based on the SNSF main discipline list.

| Field of research   | Main discipline                                                                                                                                                   |
|---------------------|-------------------------------------------------------------------------------------------------------------------------------------------------------------------|
| Medicine            | Social medicine, Basic Medical Sciences, Experimental Medicine, Clinical Medicine, Preventive Medicine (Epidemiology/Early Diagnosis/Prevention), Social Medicine |
| Architecture        | Art studies, musicology, theatre and film studies, architecture                                                                                                   |
| Biology             | Basic Biological Research, General Biology                                                                                                                        |
| Chemistry           | Chemistry, Environmental Sciences                                                                                                                                 |
| Economics           | Economics, law                                                                                                                                                    |
| Engineering         | Engineering Sciences                                                                                                                                              |
| Geology             | Earth Sciences                                                                                                                                                    |
| History             | Theology and religious studies, history, classical studies, archaeology, prehistory and early history                                                             |
| Linguistics         | Linguistics and literature, philosophy                                                                                                                            |
| Mathematics/Physics | Astronomy, Astrophysics and Space Sciences, Physics, Mathematics, Mathematics, Natural- and Engineering Sciences                                                  |
| Psychology          | Psychology, educational studies                                                                                                                                   |
| Sociology           | Sociology, social work, political sciences, media and communication studies, health, Ethnology                                                                    |

Figure S1: Overall scores depending on research topic and gender of the applicant.

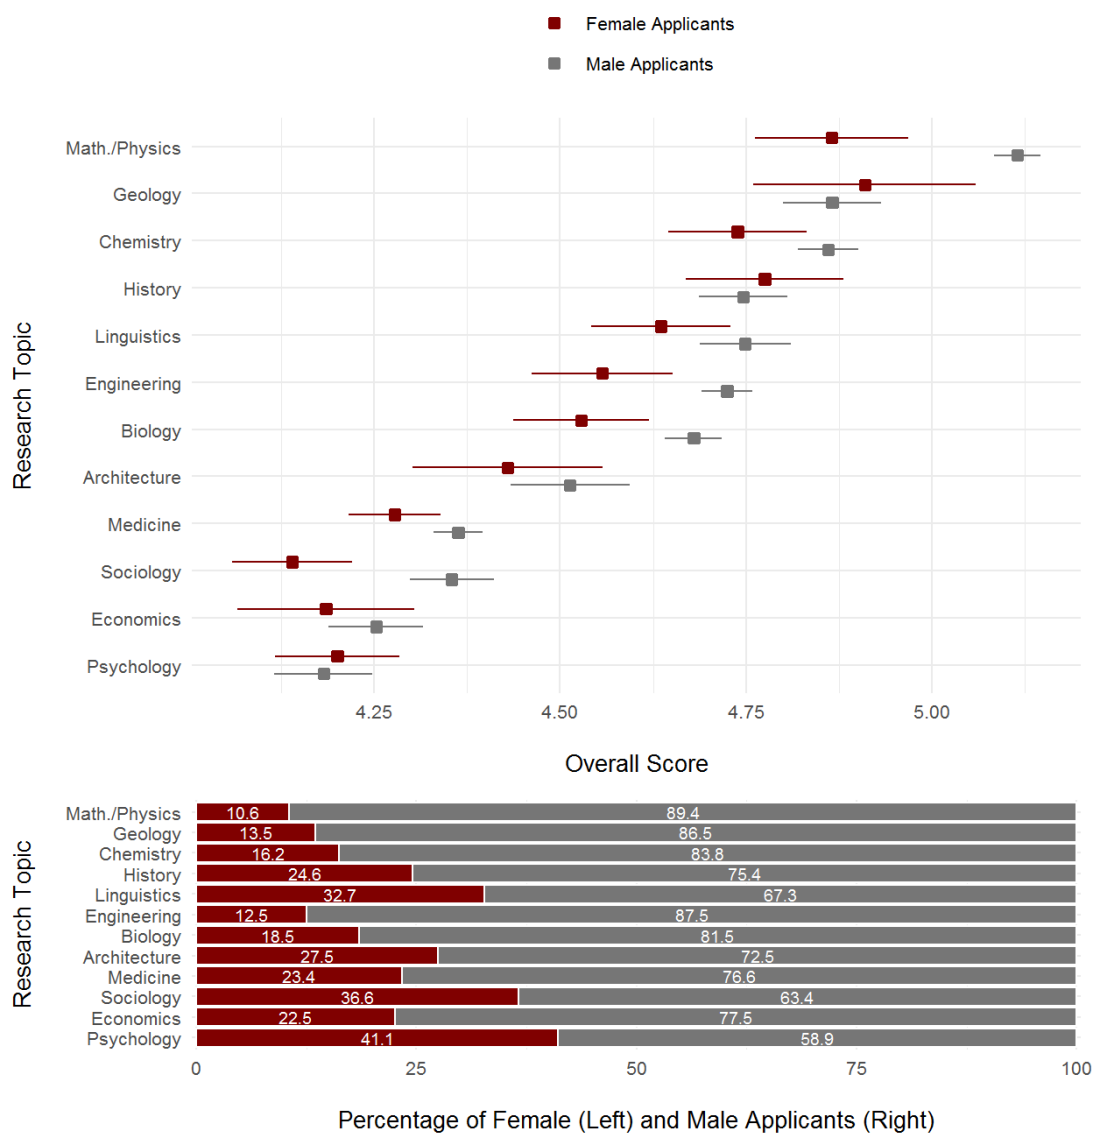

Upper panel: Average (mean) overall scores by research topic for female and male applicants; horizontal lines indicate Wald 95% confidence intervals. Lower panel: Gender distribution in the research topics.



Figure S2: Overall scores depending on the age and gender of the applicants.

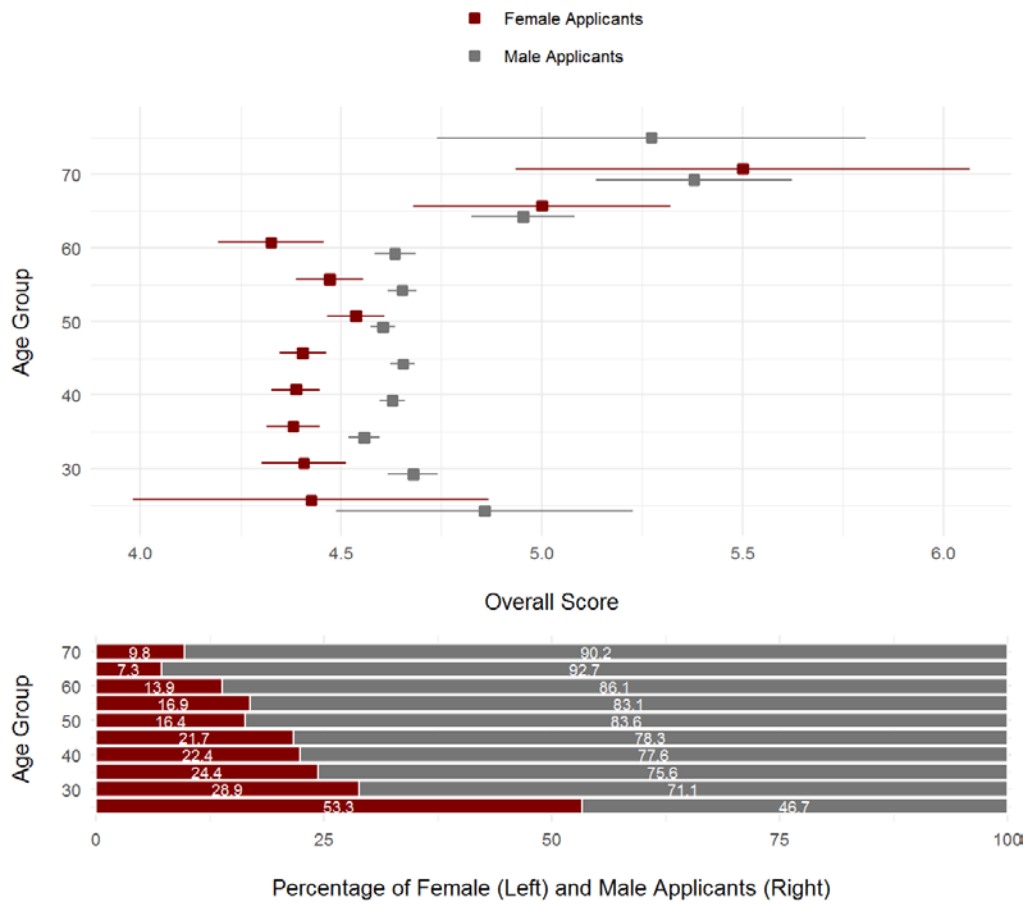

Upper panel: Average (mean) overall scores by five-year age group for female and male applicants; horizontal lines indicate Wald 95% confidence intervals. Lower panel: Gender distribution in the age groups.

Figure S3: Overall scores depending on the applicant's institution type and gender.

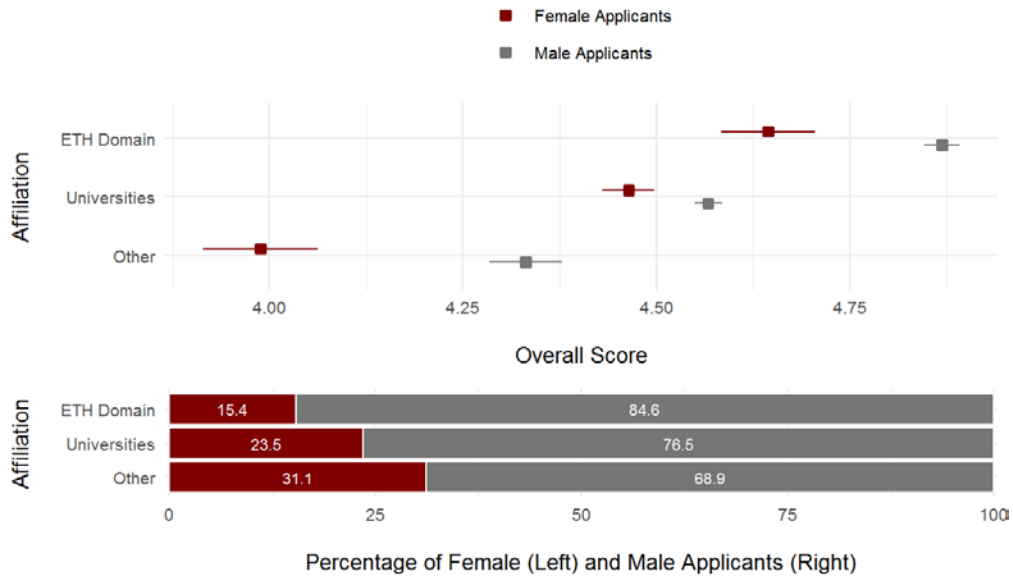

Upper panel: Average (mean) overall scores by affiliation times for female and male applicants; horizontal lines indicate Wald 95% confidence intervals. Lower panel: Gender distribution for the different affiliation types.

Figure S4: Average overall scores by nationality for female and male applicant; horizontal lines indicate Wald 95% confidence intervals.

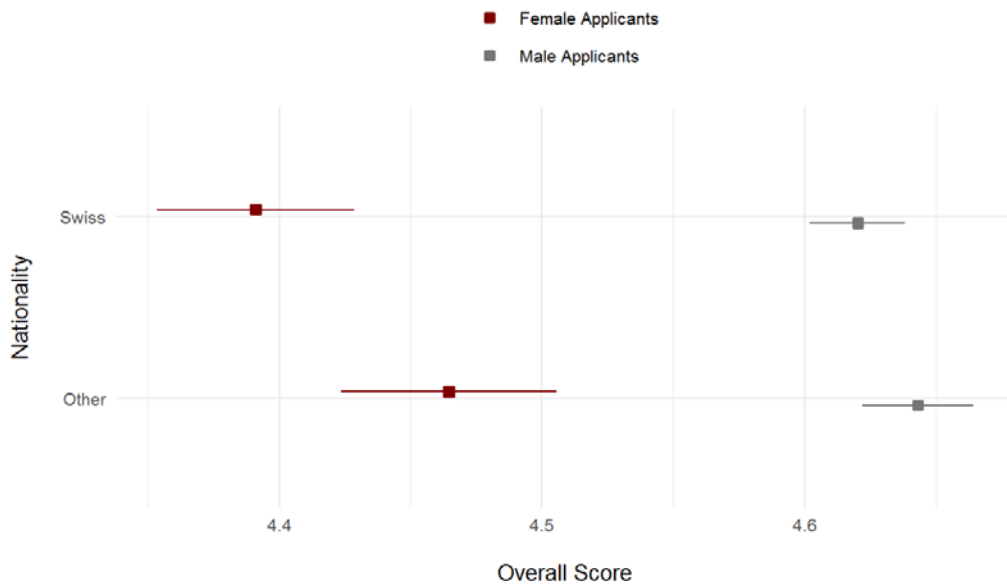

Figure S5: Average (mean) overall scores by application call deadline for female and male applicants; horizontal lines indicate Wald 95% confidence intervals.

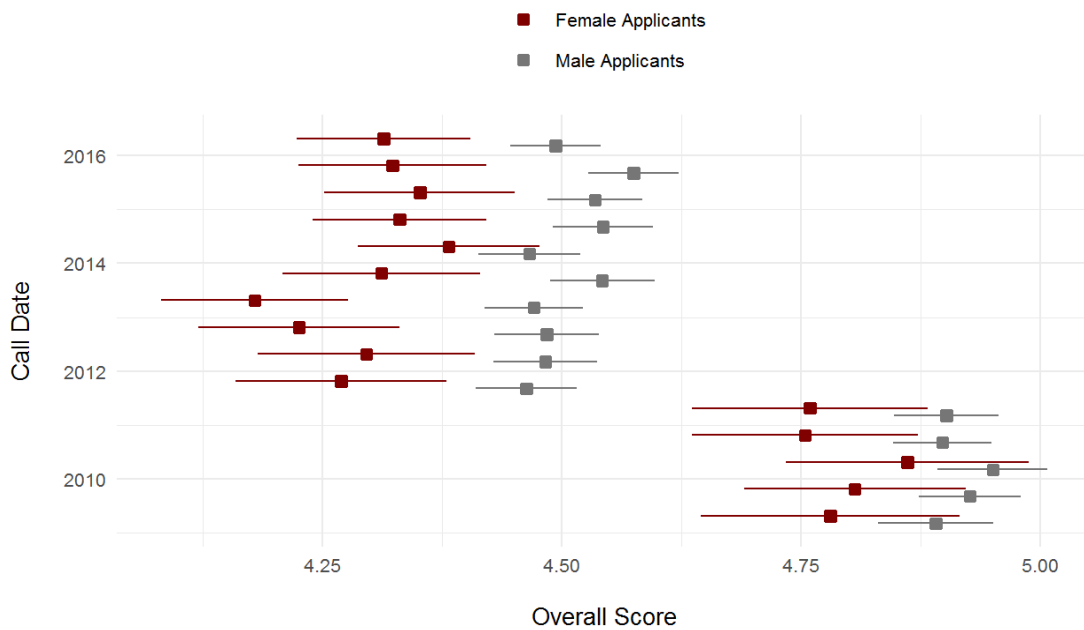

Text S1: Old and new evaluation forms. The new forms were implemented from the 1. October 2011 call onwards.

## OLD FORM

### 1. Synopsis

|                                                               | Excellent | Very Good | Good | Average | Satisfactory | Poor | Not considered |
|---------------------------------------------------------------|-----------|-----------|------|---------|--------------|------|----------------|
| Current scientific interest and impact of the project         |           |           |      |         |              |      |                |
| Originality of the work                                       |           |           |      |         |              |      |                |
| Suitability and originality of the methods to be used         |           |           |      |         |              |      |                |
| Feasibility of the project                                    |           |           |      |         |              |      |                |
| Experience and past performance of the applicant              |           |           |      |         |              |      |                |
| Specific abilities of the applicants for the proposed project |           |           |      |         |              |      |                |
| Overall assessment                                            |           |           |      |         |              |      |                |

### Comments regarding the overall assessment

---

### 2. Detailed evaluation

#### Current scientific interest and impact of the project

---

#### Originality of the work

---

1  
2  
3  
4  
5  
6  
7  
8  
9  
10  
11  
12  
13  
14  
15  
16  
17  
18  
19  
20  
21  
22  
23  
24  
25  
26  
27  
28  
29  
30  
31  
32  
33  
34  
35  
36  
37  
38  
39  
40  
41  
42  
43  
44  
45  
46

**Suitability and originality of the methods to be used**

---

**Feasibility of the project**

---

**Experience and past performance of the applicant**

---

**Specific abilities of the applicants for the proposed project**

---

**Other comments**

---

For peer review only

**NEW FORM**

**1. Synopsis**

|                                                   | <b>outstanding</b> | <b>excellent</b> | <b>very good</b> | <b>good</b> | <b>average</b> | <b>poor</b> |  | <b>Not considered</b> |
|---------------------------------------------------|--------------------|------------------|------------------|-------------|----------------|-------------|--|-----------------------|
| Applicants' scientific track record and expertise |                    |                  |                  |             |                |             |  |                       |
| Scientific relevance, originality and topicality  |                    |                  |                  |             |                |             |  |                       |
| Suitability of methods and feasibility            |                    |                  |                  |             |                |             |  |                       |
| Overall assessment                                |                    |                  |                  |             |                |             |  |                       |

**Comments regarding the overall assessment**

---

**2. Detailed evaluation**

**Applicants' scientific track record and expertise**

---

**Scientific relevance, originality and topicality**

---

**Suitability of methods and feasibility**

---

1  
2  
3  
4  
5  
6  
7  
8  
9  
10  
11  
12  
13  
14  
15  
16  
17  
18  
19  
20  
21  
22  
23  
24  
25  
26  
27  
28  
29  
30  
31  
32  
33  
34  
35  
36  
37  
38  
39  
40  
41  
42  
43  
44  
45  
46

**3. Further comments & declaration concerning conflicts of interests (will not be forwarded to applicants)**

**Confidential messages**

---

**The topic of the proposed project**

---

**Declaration concerning conflict of interests (comments, if applicable)**

---

For peer review only

STROBE Statement—Checklist of items that should be included in reports of *cross-sectional studies*

|                              | Item No | Recommendation                                                                                                                                                                                    | Page No            |
|------------------------------|---------|---------------------------------------------------------------------------------------------------------------------------------------------------------------------------------------------------|--------------------|
| <b>Title and abstract</b>    | 1       | (a) Indicate the study's design with a commonly used term in the title or the abstract                                                                                                            | 1                  |
|                              |         | (b) Provide in the abstract an informative and balanced summary of what was done and what was found                                                                                               | 2                  |
| <b>Introduction</b>          |         |                                                                                                                                                                                                   |                    |
| Background/rationale         | 2       | Explain the scientific background and rationale for the investigation being reported                                                                                                              | 4-5                |
| Objectives                   | 3       | State specific objectives, including any prespecified hypotheses                                                                                                                                  | 5                  |
| <b>Methods</b>               |         |                                                                                                                                                                                                   |                    |
| Study design                 | 4       | Present key elements of study design early in the paper                                                                                                                                           | 6                  |
| Setting                      | 5       | Describe the setting, locations, and relevant dates, including periods of recruitment, exposure, follow-up, and data collection                                                                   | 5                  |
| Participants                 | 6       | (a) Give the eligibility criteria, and the sources and methods of selection of participants                                                                                                       | n.a.               |
| Variables                    | 7       | Clearly define all outcomes, exposures, predictors, potential confounders, and effect modifiers. Give diagnostic criteria, if applicable                                                          | 6                  |
| Data sources/<br>measurement | 8*      | For each variable of interest, give sources of data and details of methods of assessment (measurement). Describe comparability of assessment methods if there is more than one group              | 6                  |
| Bias                         | 9       | Describe any efforts to address potential sources of bias                                                                                                                                         | 7                  |
| Study size                   | 10      | Explain how the study size was arrived at                                                                                                                                                         | 6                  |
| Quantitative variables       | 11      | Explain how quantitative variables were handled in the analyses. If applicable, describe which groupings were chosen and why                                                                      | 7                  |
| Statistical methods          | 12      | (a) Describe all statistical methods, including those used to control for confounding                                                                                                             | 7                  |
|                              |         | (b) Describe any methods used to examine subgroups and interactions                                                                                                                               | 7                  |
|                              |         | (c) Explain how missing data were addressed                                                                                                                                                       | 7                  |
|                              |         | (d) If applicable, describe analytical methods taking account of sampling strategy                                                                                                                | n.a.               |
|                              |         | (e) Describe any sensitivity analyses                                                                                                                                                             | n.a.               |
| <b>Results</b>               |         |                                                                                                                                                                                                   |                    |
| Participants                 | 13*     | (a) Report numbers of individuals at each stage of study—eg numbers potentially eligible, examined for eligibility, confirmed eligible, included in the study, completing follow-up, and analysed | 8                  |
|                              |         | (b) Give reasons for non-participation at each stage                                                                                                                                              | n.a.               |
|                              |         | (c) Consider use of a flow diagram                                                                                                                                                                | n.a.               |
| Descriptive data             | 14*     | (a) Give characteristics of study participants (eg demographic, clinical, social) and information on exposures and potential confounders                                                          | 8                  |
|                              |         | (b) Indicate number of participants with missing data for each variable of interest                                                                                                               | 8                  |
| Outcome data                 | 15*     | Report numbers of outcome events or summary measures                                                                                                                                              | 8,9,<br>Table<br>2 |



1  
2  
3  
4  
5  
6  
7  
8  
9  
10  
11  
12  
13  
14  
15  
16  
17  
18  
19  
20  
21  
22  
23  
24  
25  
26  
27  
28  
29  
30  
31  
32  
33  
34  
35  
36  
37  
38  
39  
40  
41  
42  
43  
44  
45  
46  
47  
48  
49  
50  
51  
52  
53  
54  
55  
56  
57  
58  
59  
60

|                          |    |                                                                                                                                                                                                              |         |
|--------------------------|----|--------------------------------------------------------------------------------------------------------------------------------------------------------------------------------------------------------------|---------|
| Main results             | 16 | (a) Give unadjusted estimates and, if applicable, confounder-adjusted estimates and their precision (eg, 95% confidence interval). Make clear which confounders were adjusted for and why they were included | Table 3 |
|                          |    | (b) Report category boundaries when continuous variables were categorized                                                                                                                                    | n.a.    |
|                          |    | (c) If relevant, consider translating estimates of relative risk into absolute risk for a meaningful time period                                                                                             | n.a.    |
| Other analyses           | 17 | Report other analyses done—eg analyses of subgroups and interactions, and sensitivity analyses                                                                                                               | 10      |
| <b>Discussion</b>        |    |                                                                                                                                                                                                              |         |
| Key results              | 18 | Summarise key results with reference to study objectives                                                                                                                                                     | 11      |
| Limitations              | 19 | Discuss limitations of the study, taking into account sources of potential bias or imprecision. Discuss both direction and magnitude of any potential bias                                                   | 13      |
| Interpretation           | 20 | Give a cautious overall interpretation of results considering objectives, limitations, multiplicity of analyses, results from similar studies, and other relevant evidence                                   | 11-14   |
| Generalisability         | 21 | Discuss the generalisability (external validity) of the study results                                                                                                                                        | 13      |
| <b>Other information</b> |    |                                                                                                                                                                                                              |         |
| Funding                  | 22 | Give the source of funding and the role of the funders for the present study and, if applicable, for the original study on which the present article is based                                                | 15      |

\*Give information separately for exposed and unexposed groups.

**Note:** An Explanation and Elaboration article discusses each checklist item and gives methodological background and published examples of transparent reporting. The STROBE checklist is best used in conjunction with this article (freely available on the Web sites of PLoS Medicine at <http://www.plosmedicine.org/>, Annals of Internal Medicine at <http://www.annals.org/>, and Epidemiology at <http://www.epidem.com/>). Information on the STROBE Initiative is available at [www.strobe-statement.org](http://www.strobe-statement.org).
