# Supplementary material for: Gender and other potential biases in peer review: cross-sectional analysis of 38 250 external peer review reports
Source: PubMed Central journal article supplement (PMC7440717; doi:10.1136/bmjopen-2019-035058), 2020-08-20
Supplement: bmjopen-2019-035058supp001.pdf [file bmjopen-2019-035058supp001.pdf]

## Supplementary materials

**Table S1: P values from interaction tests of gender of the applicant with other variables, based on bivariable and multivariable models.**

|                                    | <b>Bivariable</b> | <b>Multivariable*</b> |
|------------------------------------|-------------------|-----------------------|
| Gender of reviewer                 | 0.011             | 0.037                 |
| Source of nomination of reviewer   | 0.71              | 0.17                  |
| Country of affiliation of reviewer | 0.57              | 0.27                  |
| Age of applicant                   | 0.74              | 0.67                  |
| Affiliation of the applicant       | <0.001            | 0.003                 |
| Nationality of the applicant       | 0.51              | 0.92                  |
| Research topic                     | 0.36              | 0.31                  |
| Change of guidelines               | 0.065             | 0.033                 |

\*Adjusted for all variables listed in Table 2 of the main paper.

**Table S2: Definition of the field of research.**

The field of research is based on the SNSF main discipline list.

| <b>Field of research</b> | <b>Main discipline</b>                                                                                                                                            |
|--------------------------|-------------------------------------------------------------------------------------------------------------------------------------------------------------------|
| Medicine                 | Social medicine, Basic Medical Sciences, Experimental Medicine, Clinical Medicine, Preventive Medicine (Epidemiology/Early Diagnosis/Prevention), Social Medicine |
| Architecture             | Art studies, musicology, theatre and film studies, architecture                                                                                                   |
| Biology                  | Basic Biological Research, General Biology                                                                                                                        |
| Chemistry                | Chemistry, Environmental Sciences                                                                                                                                 |
| Economics                | Economics, law                                                                                                                                                    |
| Engineering              | Engineering Sciences                                                                                                                                              |
| Geology                  | Earth Sciences                                                                                                                                                    |
| History                  | Theology and religious studies, history, classical studies, archaeology, prehistory and early history                                                             |
| Linguistics              | Linguistics and literature, philosophy                                                                                                                            |
| Mathematics/Physics      | Astronomy, Astrophysics and Space Sciences, Physics, Mathematics, Mathematics, Natural- and Engineering Sciences                                                  |
| Psychology               | Psychology, educational studies                                                                                                                                   |
| Sociology                | Sociology, social work, political sciences, media and communication studies, health, Ethnology                                                                    |

**Figure S1: Overall scores depending on research topic and gender of the applicant.**

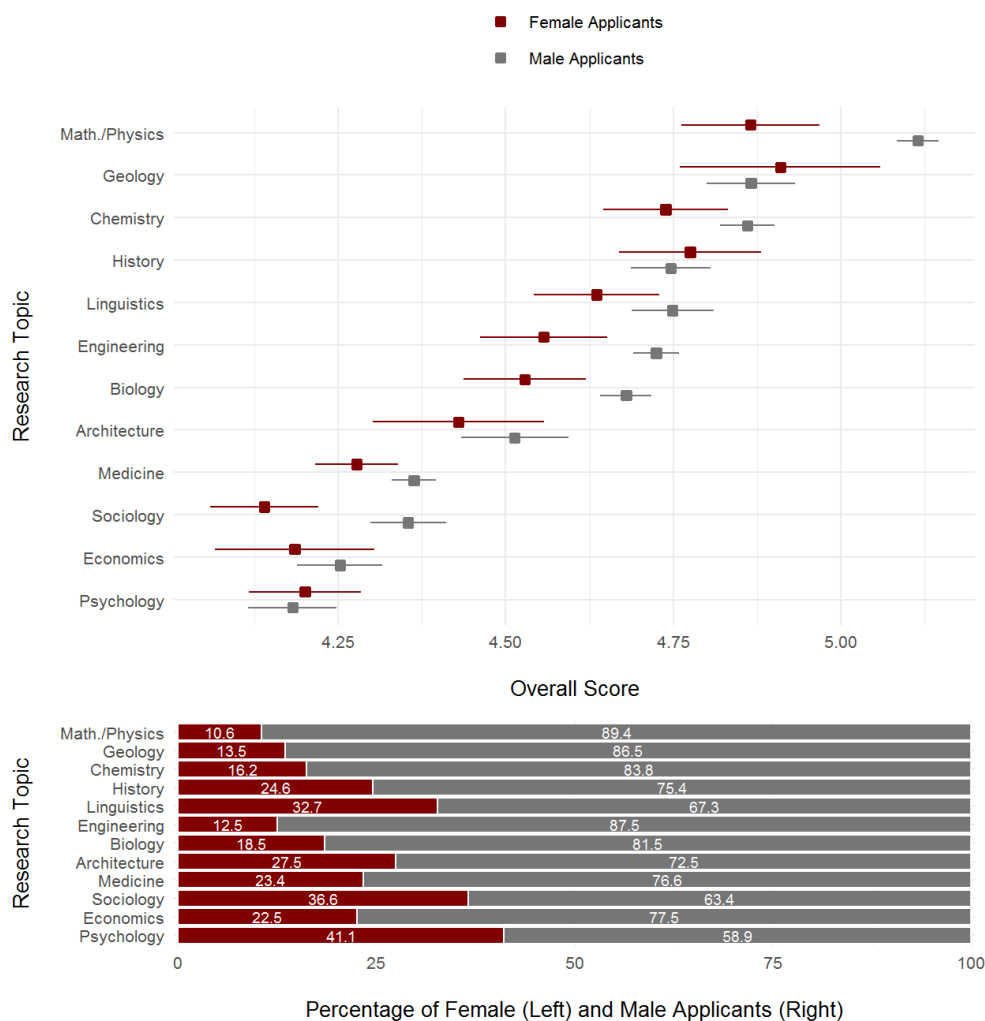

Upper panel: Average (mean) overall scores by research topic for female and male applicants; horizontal lines indicate Wald 95% confidence intervals. Lower panel: Gender distribution in the research topics.

**Figure S2: Overall scores depending on the age and gender of the applicants.**

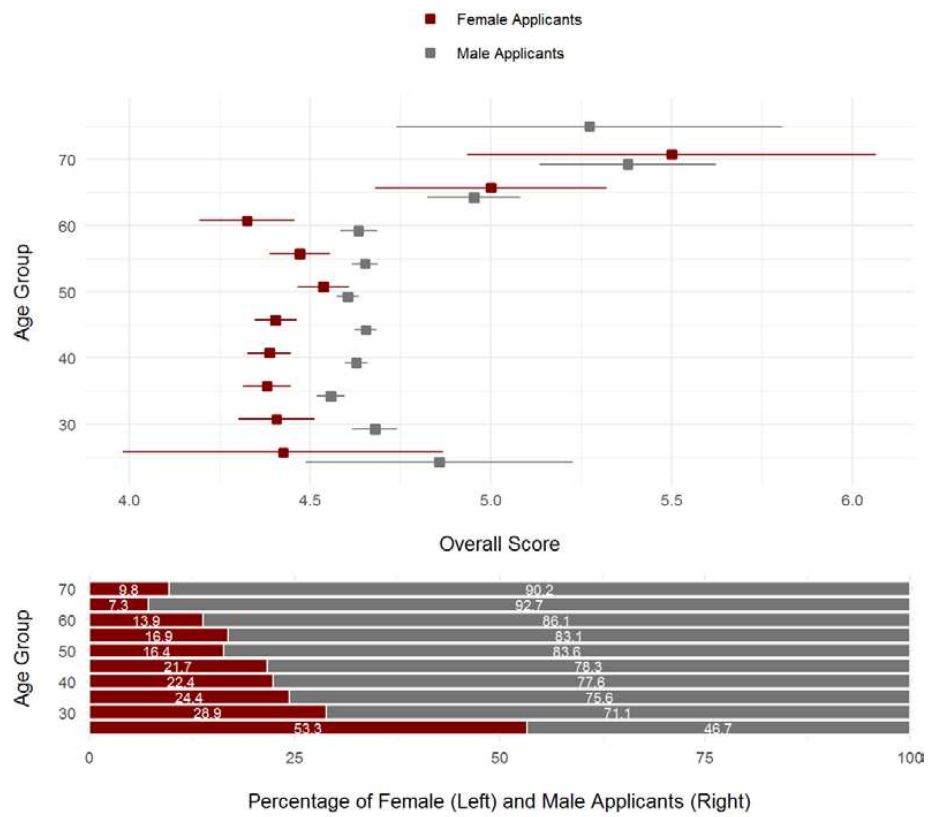

Upper panel: Average (mean) overall scores by five-year age group for female and male applicants; horizontal lines indicate Wald 95% confidence intervals. Lower panel: Gender distribution in the age groups.

**Figure S3: Overall scores depending on the applicant's institution type and gender.**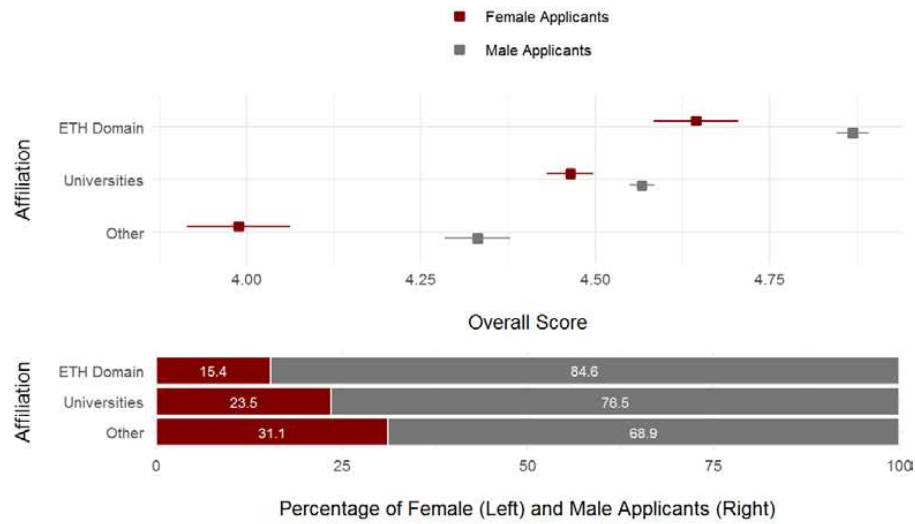

Upper panel: Average (mean) overall scores by affiliation times for female and male applicants; horizontal lines indicate Wald 95% confidence intervals. Lower panel: Gender distribution for the different affiliation types.

**Figure S4: Average overall scores by nationality for female and male applicant; horizontal lines indicate Wald 95% confidence intervals.**

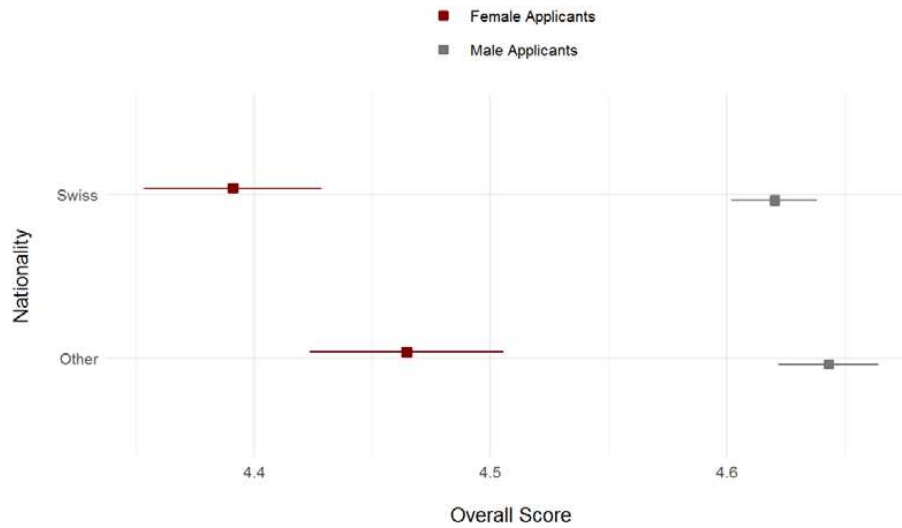

**Figure S5: Average (mean) overall scores by application call deadline for female and male applicants; horizontal lines indicate Wald 95% confidence intervals.**

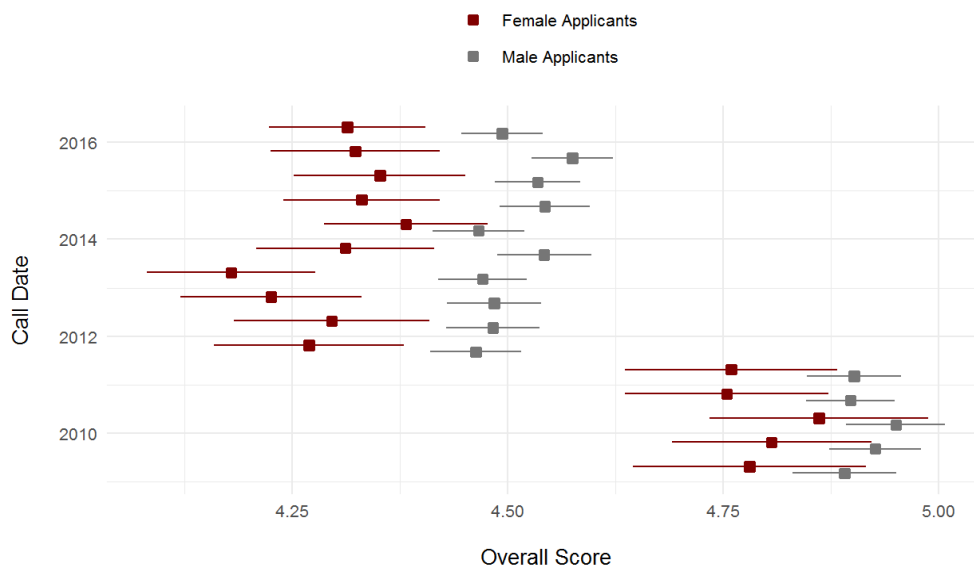

**Text S1: Old and new evaluation forms. The new forms were implemented from the 1. October 2011 call onwards.**

**OLD FORM**

**1. Synopsis**

|                                                               | <b>Excellent</b> | <b>Very Good</b> | <b>Good</b> | <b>Average</b> | <b>Satisfactory</b> | <b>Poor</b> |  | <b>Not considered</b> |
|---------------------------------------------------------------|------------------|------------------|-------------|----------------|---------------------|-------------|--|-----------------------|
| Current scientific interest and impact of the project         |                  |                  |             |                |                     |             |  |                       |
| Originality of the work                                       |                  |                  |             |                |                     |             |  |                       |
| Suitability and originality of the methods to be used         |                  |                  |             |                |                     |             |  |                       |
| Feasibility of the project                                    |                  |                  |             |                |                     |             |  |                       |
| Experience and past performance of the applicant              |                  |                  |             |                |                     |             |  |                       |
| Specific abilities of the applicants for the proposed project |                  |                  |             |                |                     |             |  |                       |
| Overall assessment                                            |                  |                  |             |                |                     |             |  |                       |

**Comments regarding the overall assessment**

---

**2. Detailed evaluation**

**Current scientific interest and impact of the project**

---

**Originality of the work**

---

**Suitability and originality of the methods to be used**

---

**Feasibility of the project**

---

**Experience and past performance of the applicant**

---

**Specific abilities of the applicants for the proposed project**

---

**Other comments**

---

**NEW FORM****1. Synopsis**

|                                                   | <b>outstanding</b> | <b>excellent</b> | <b>very good</b> | <b>good</b> | <b>average</b> | <b>poor</b> |  | <b>Not considered</b> |
|---------------------------------------------------|--------------------|------------------|------------------|-------------|----------------|-------------|--|-----------------------|
| Applicants' scientific track record and expertise |                    |                  |                  |             |                |             |  |                       |
| Scientific relevance, originality and topicality  |                    |                  |                  |             |                |             |  |                       |
| Suitability of methods and feasibility            |                    |                  |                  |             |                |             |  |                       |
| Overall assessment                                |                    |                  |                  |             |                |             |  |                       |

**Comments regarding the overall assessment****2. Detailed evaluation****Applicants' scientific track record and expertise****Scientific relevance, originality and topicality****Suitability of methods and feasibility**



**3. Further comments & declaration concerning conflicts of interests (will not be forwarded to applicants)**

**Confidential messages**

---

**The topic of the proposed project**

---

**Declaration concerning conflict of interests (comments, if applicable)**

---
